# Supplementary material
Source: PubMed Central journal article supplement (PMC7529964)
Supplement: NIHMS1604165-supplement-1.pdf [file NIHMS1604165-supplement-1.pdf]

1 **Supplementary methods and analysis from “Dominant bee species and floral abundance**  
2 **drive parasite temporal dynamics in plant-pollinator communities”, Graystock et al.**

3

4 *Broad multiplex PCR panels to diagnose major bee parasites*

5 We first screened samples for three groups of taxa known to contain common pollinator  
6 parasites, trypanosomatids, Microsporidians and *Apicystis*, in multiplex 1. Samples  
7 determined to be positive for either Trypanosome or Microsporidia were then used in further  
8 multiplex assays to determine the presence of trypanosomes common in North American  
9 bees (*Crithidia bombi*, *C. expoeki*) or Microsporidians (*Nosema bombi*, *N. ceranae*)  
10 respectively. *Apicystis bombi* is the only *Apicystis* species reported in bees, so further  
11 multiplexes were not performed on these positives. In addition to this multiplex, we ran a  
12 host control on all bee samples using Apidae general primers 2 which we found to amplify  
13 across the broad range of hosts used here. For all Primers, subsets of positives were  
14 sequenced to confirm correct amplification. Primers, reagent concentrations, and thermal  
15 cycling conditions are shown in Supplementary Table 1.

16

17 *Trypanosomatid multiplex to diagnose two common Crithidia parasite species*

18 Samples found to be positive for trypanosomatids in the broad multiplex were then further  
19 screened in a multiplex designed to indicate single and dual infections of *C. bombi* and *C.*  
20 *expoeki*, which was developed as part of previously published project 3. Primers, reagent  
21 concentrations, and thermal cycling conditions are shown in Supplementary Table 1.

22

23 *Microsporidia multiplex to diagnose two common Nosema parasite species*

24 Samples found to be positive for Microsporidia in the broad multiplex were then further  
25 screened in a duplex designed to indicate single and dual infections of *N. bombi* and *N.*  
26 *ceranae*. Although most of the genetic data associated with the Microsporidia on GenBank is

27 based on portions of the small subunit region (16S), we were interested in using less variable  
28 regions that were highly discernable in each species. Using a modified version of primers  
29 NoscRNAPol-F2 (5'-GGGTTCCCTAACCTGGTGGTTT-3' and NoscRNAPol-R2 (5'-  
30 TCACATGACCTGGTGCTCCTTCT -3') that amplify a >600 bp region of largest subunit of  
31 the protein-coding DNA-dependent, RNA polymerase II (RPB1) <sup>4</sup>, we obtained sequences of  
32 *N. bombi* (MG494263) and *N. ceranae* (MN175395). These were aligned with available *N.*  
33 *ceranae* (XM\_002995356) and *N. apis* (JX213670) sequences from GenBank in Geneious  
34 v.6.1.8 (Biomatters, Auckland, NZ). With the aid of the Primer 3 plug-in <sup>5</sup>, we selected  
35 suitable priming regions unique to *N. bombi* or *N. ceranae*.

36

37 Potential primers were then examined to ensure that they would not produce amplicons for  
38 non-target species and that amplicons for each species could be visually differentiated by  
39 routine electrophoresis based on their size differential. Representative sequences of a variety  
40 of Microsporidia (*N. apis*: DQ996230, DQ996232, JX213663, JX213665, JX213751,  
41 JX213670, HQ457438, HQ457435, HQ457436; *N. bombycis*: JX213751; *N. disstriae*:  
42 HQ457438; *N. empoascae*: DQ996232; *N. fumiferanae*: HQ457438; *N. granulosis*:  
43 DQ996233; *N. lymantriae*: JX213749; *N. sp.*: HQ457436, HQ457437; *N. trichoplusiae*:  
44 DQ996234; *Varimorpha necatrix*: DQ996236), were screened to ensure primer specificity. A  
45 final set of differential primers was selected from those that had similar melting temperatures  
46 and minimal interactions when combined in a single reaction. The novel primer set NB185F  
47 (5'- ACTAAGCCAATGTTCCACGTT -3') and NB185R (5'-  
48 CCAGTAAACCCACTTTCACAGAT -3') produces an amplicon 185 bp long if *N. bombi*  
49 DNA is present, and NC288F (5'- TGAGGGAGAATTAACCGAGGC-3') plus NC288R (5'-  
50 AGCATCCCTTCCATAACAATAGATG-3') produces an amplicon 288 bp in the presence  
51 of *N. ceranae* DNA.

52

53 Before being applied to the samples in this experiment, primer sets were tested in PCR both  
54 singly and in combination with positives and negatives verified by microscopy to ensure  
55 accurate diagnosis. Sequences of *N. ceranae* obtained with the NC288F-NC288R primer set  
56 were deposited on Genbank (MG494264, MG494265; 242 bp with primer regions trimmed),  
57 but because *N. bombi* sequences obtained with NB185F-NB185R were < 200 bp, they were  
58 not eligible for deposition. A representative sequence (141 bp with the primer regions  
59 trimmed) is 5'-

60 GGGTACATGAACAAGATCAAAAAGATTTTAGAATGTGTGTGCTACTATTGTTCAA  
61 AAATAAAAATTGACAAGAAATCTTTGAAGAAAGACTTGAATTTTGTATGGAATG  
62 CTTGTAAAGCTAAAGCAGTTTGTGAAGGAGAA-3' (Internal Sample Numbers AS107,  
63 WC066). Extracted DNA and slide-mounted tissues are archived at the USDA-Pollinating  
64 Insects Research Unit in Logan, Utah. Primers, reagent concentrations, and thermal cycling  
65 conditions are shown in Supplementary Table 1.

66

67 **Supplementary Table 1 | PCR mixes and conditions for the detection of the various**  
 68 **parasites.**

| Primers & source                                                                                                                                                                                                                                                                                                             | Assay mix |                        |               |         |                                                             |                                                             |               |                   | Thermal cycling              |                                      |                              | Amplicon size (bp)                                          |
|------------------------------------------------------------------------------------------------------------------------------------------------------------------------------------------------------------------------------------------------------------------------------------------------------------------------------|-----------|------------------------|---------------|---------|-------------------------------------------------------------|-------------------------------------------------------------|---------------|-------------------|------------------------------|--------------------------------------|------------------------------|-------------------------------------------------------------|
|                                                                                                                                                                                                                                                                                                                              | dNTP (mM) | MgCl <sub>2</sub> (mM) | 5xbuffer (µl) | Taq (U) | Primer F (µM)                                               | Primer R (µM)                                               | Template (µl) | Total volume (µl) | 1 - Denaturing<br>Min   Temp | 2 - Replication<br>Sec   Temp        | 3 - Elongation<br>Min   Temp |                                                             |
| <b>Broad multiplex</b><br><i>Trypanosomatid</i> <sup>TA</sup> ,<br><i>Microsporidia</i> <sup>MA</sup> & <i>Apicystis</i> <sup>AB</sup><br><sup>1</sup>                                                                                                                                                                       | 0.4       | 2.5                    | 2.6           | 1       | 0.8 <sup>TA</sup><br>0.8 <sup>MA</sup><br>0.8 <sup>AB</sup> | 0.8 <sup>TA</sup><br>0.8 <sup>MA</sup><br>0.8 <sup>AB</sup> | 1             | 10                | 2   94                       | 10x<br>30   94<br>30   60<br>45   72 | 5   72                       | 584 <sup>TA</sup><br>270 <sup>MA</sup><br>357 <sup>AB</sup> |
| <i>CB-SSUrRNA-F2</i> (5-3):<br>CTTTGGACGAACAACCTGCCCTATC<br><i>CB18SR2</i> (5-3):<br>TGCTCCTTTGTTATCCCATGCT<br><i>MSPorF2</i> (5-3):<br>AGTGGTGCAATGGCCGTTTTC<br><i>MSPorDegR</i> (5-3):<br>GGTGTGTRCAAAAGAACAGGG<br><i>Apicyst357F</i> (5-3):<br>AGCGATGGATGCTTGGGTC<br><i>Apicyst357R</i> (5-3):<br>CCTAGTAGTTTCTTTCCTCCGC |           |                        |               |         |                                                             |                                                             |               |                   |                              |                                      |                              |                                                             |
| <b>Crithidia Multiplex</b><br><i>C. sp.</i> , <i>C. bombi</i> <sup>CB</sup> and <i>C. expoekice</i> <sup>3</sup>                                                                                                                                                                                                             | 0.4       | 2.5                    | 2.6           | 1       | 0.8 <sup>C</sup><br>0.8 <sup>CB</sup><br>0.8 <sup>CE</sup>  | 0.8 <sup>C</sup><br>0.8 <sup>CB</sup><br>0.8 <sup>CE</sup>  | 1             | 10                | 2   94                       | 40x<br>45   94<br>45   57<br>60   72 | 7   72                       | 470 <sup>C</sup><br>279 <sup>CB</sup><br>163 <sup>CE</sup>  |
| <i>Crith18SF</i> (5-3):<br>TACCACTTCTACGGAGGGCA<br><i>CB18SR2</i> (5-3):<br>TGCTCCTTTGTTATCCCATGCT<br><i>CB279F</i> (5-3):<br>ATACTCATATTTAGTGTGGGCTGT<br><i>CB279R</i> (5-3):<br>AACAAAAAATGCATTACAATAACTA<br><i>CE163F</i> (5-3):<br>TGTACTATGATGTCGTATTGAGGT<br><i>CE163R</i> (5-3):<br>ATACAAATGGCAATAAACATGTAAAA        |           |                        |               |         |                                                             |                                                             |               |                   |                              |                                      |                              |                                                             |
| <b>Nosema Duplex</b><br><i>N. bombi</i> <sup>NB</sup> and <i>N. ceranae</i> <sup>NC</sup><br>(This study)                                                                                                                                                                                                                    | 0.4       | 2.5                    | 2.6           | 1       | 0.8 <sup>NC</sup><br>0.8 <sup>NB</sup>                      | 0.8 <sup>NC</sup><br>0.8 <sup>NB</sup>                      | 1             | 10                | 2   94                       | 40x<br>45   94<br>45   57<br>60   72 | 5   72                       | 288 <sup>NC</sup><br>185 <sup>NB</sup>                      |
| <i>NB185F</i> (5-3):<br>ACTAAGCCAATGTTCCACGTT<br><i>NB185R</i> (5-3):<br>CCAGTAAACCCACTTTCACAGAT<br><i>NC288F</i> (5-3):<br>TGAGGGAGAATTAACCGAGGC<br><i>NC288R</i> (5-3):<br>AGCATCCCTCCATAACAATAGATG                                                                                                                        |           |                        |               |         |                                                             |                                                             |               |                   |                              |                                      |                              |                                                             |
| <b>Host control</b><br><i>Apidae</i> <sup>2</sup>                                                                                                                                                                                                                                                                            | 0.2       | 1.5                    | 2             | 1.25    | 0.2                                                         | 0.2                                                         | 1             | 10                | 2   94                       | 35x<br>60   94<br>60   57<br>60   72 | 5   72                       | 130                                                         |
| <i>ApidaeF</i> (5-3):<br>AGATGGGGGCATTCTGTATTG<br><i>ApidaeR</i> (5-3):<br>ATCTGATCGCCTTCGAACCT                                                                                                                                                                                                                              |           |                        |               |         |                                                             |                                                             |               |                   |                              |                                      |                              |                                                             |

69  
70

71 **Supplementary Table 2 | Parasite prevalence among the 89 species of flowers that were**  
 72 **screened.** (*n* = 2,631 individual flowers were screened in total.)  
 73

| Plant species                 | Samples screened | Percent positive with <i>Nosema bombi</i> | Percent positive with <i>Nosema ceranae</i> | Percent positive with <i>Crithidia bombi</i> | Percent positive with <i>Crithidia expoeki</i> | Percent positive with <i>Neogregarines</i> |
|-------------------------------|------------------|-------------------------------------------|---------------------------------------------|----------------------------------------------|------------------------------------------------|--------------------------------------------|
| <i>Achillea millefolium</i>   | 3                | 0.0                                       | 0.0                                         | 0.0                                          | 0.0                                            | 0.0                                        |
| <i>Alliaria petiolata</i>     | 1                | 0.0                                       | 0.0                                         | 0.0                                          | 0.0                                            | 0.0                                        |
| <i>Anaphalis margaritacea</i> | 2                | 0.0                                       | 0.0                                         | 0.0                                          | 0.0                                            | 0.0                                        |
| <i>Anemone nemorosa</i>       | 2                | 0.0                                       | 50.0                                        | 0.0                                          | 0.0                                            | 0.0                                        |
| <i>Apocynum cannabinum</i>    | 16               | 0.0                                       | 0.0                                         | 6.3                                          | 0.0                                            | 0.0                                        |
| <i>Asclepias incarnata</i>    | 2                | 0.0                                       | 0.0                                         | 0.0                                          | 0.0                                            | 0.0                                        |
| <i>Asclepias syriaca</i>      | 12               | 0.0                                       | 0.0                                         | 0.0                                          | 0.0                                            | 0.0                                        |
| <i>Brassica rapa</i>          | 12               | 16.7                                      | 0.0                                         | 8.3                                          | 0.0                                            | 25.0                                       |
| <i>Calystegia sepium</i>      | 3                | 0.0                                       | 0.0                                         | 0.0                                          | 0.0                                            | 0.0                                        |
| <i>Centaurea stoebe</i>       | 265              | 2.3                                       | 0.8                                         | 6.0                                          | 2.3                                            | 6.0                                        |
| <i>Cerastium fontanum</i>     | 2                | 0.0                                       | 0.0                                         | 0.0                                          | 0.0                                            | 0.0                                        |
| <i>Cichorium intybus</i>      | 15               | 6.7                                       | 0.0                                         | 0.0                                          | 0.0                                            | 0.0                                        |
| <i>Cirsium arvense</i>        | 35               | 0.0                                       | 0.0                                         | 5.7                                          | 0.0                                            | 0.0                                        |
| <i>Cirsium vulgare</i>        | 8                | 0.0                                       | 0.0                                         | 0.0                                          | 0.0                                            | 0.0                                        |
| <i>Clematis virginiana</i>    | 3                | 0.0                                       | 0.0                                         | 0.0                                          | 0.0                                            | 0.0                                        |
| <i>Clinopodium vulgare</i>    | 18               | 0.0                                       | 0.0                                         | 0.0                                          | 0.0                                            | 0.0                                        |
| <i>Cornus racemosa</i>        | 2                | 0.0                                       | 0.0                                         | 0.0                                          | 0.0                                            | 0.0                                        |
| <i>Daucus carota</i>          | 79               | 5.1                                       | 1.3                                         | 1.3                                          | 2.5                                            | 5.1                                        |
| <i>Dianthus armeria</i>       | 15               | 0.0                                       | 0.0                                         | 0.0                                          | 0.0                                            | 0.0                                        |
| <i>Dipsacus fullonum</i>      | 53               | 0.0                                       | 0.0                                         | 5.7                                          | 1.9                                            | 0.0                                        |
| <i>Doellingeria umbellata</i> | 23               | 4.3                                       | 0.0                                         | 0.0                                          | 0.0                                            | 0.0                                        |
| <i>Epilobium ciliatum</i>     | 2                | 0.0                                       | 0.0                                         | 0.0                                          | 0.0                                            | 0.0                                        |
| <i>Erigeron annuus</i>        | 35               | 2.9                                       | 2.9                                         | 0.0                                          | 2.9                                            | 2.9                                        |
| <i>Erigeron sp.</i>           | 2                | 0.0                                       | 0.0                                         | 0.0                                          | 0.0                                            | 0.0                                        |
| <i>Eupatorium perfoliatum</i> | 4                | 0.0                                       | 0.0                                         | 0.0                                          | 0.0                                            | 0.0                                        |
| <i>Eutrochium maculatum</i>   | 13               | 0.0                                       | 0.0                                         | 0.0                                          | 0.0                                            | 0.0                                        |
| <i>Fragaria virginiana</i>    | 56               | 5.4                                       | 1.8                                         | 5.4                                          | 0.0                                            | 0.0                                        |
| <i>Galium mollugo</i>         | 5                | 0.0                                       | 0.0                                         | 0.0                                          | 0.0                                            | 0.0                                        |
| <i>Glechoma hederacea</i>     | 3                | 0.0                                       | 0.0                                         | 0.0                                          | 0.0                                            | 0.0                                        |
| <i>Hesperis matronalis</i>    | 3                | 0.0                                       | 0.0                                         | 0.0                                          | 0.0                                            | 0.0                                        |
| <i>Hieracium aurantiacum</i>  | 3                | 33.3                                      | 33.3                                        | 0.0                                          | 0.0                                            | 0.0                                        |
| <i>Hieracium caespitosum</i>  | 27               | 0.0                                       | 3.7                                         | 3.7                                          | 0.0                                            | 7.4                                        |
| <i>Hieracium pilosella</i>    | 6                | 0.0                                       | 0.0                                         | 0.0                                          | 0.0                                            | 0.0                                        |
| <i>Hieracium scabrum</i>      | 47               | 2.1                                       | 0.0                                         | 4.3                                          | 0.0                                            | 6.4                                        |
| <i>Hieracium sp.</i>          | 29               | 6.9                                       | 0.0                                         | 3.4                                          | 6.9                                            | 3.4                                        |

|                                   |     |     |     |      |     |      |
|-----------------------------------|-----|-----|-----|------|-----|------|
| <i>Hypericum perforatum</i>       | 15  | 0.0 | 0.0 | 0.0  | 0.0 | 0.0  |
| <i>Impatiens capensis</i>         | 8   | 0.0 | 0.0 | 0.0  | 0.0 | 0.0  |
| <i>Leucanthemum vulgare</i>       | 100 | 5.0 | 2.0 | 1.0  | 5.0 | 2.0  |
| <i>Linaria vulgaris</i>           | 3   | 0.0 | 0.0 | 0.0  | 0.0 | 0.0  |
| <i>Lobelia siphilitica</i>        | 3   | 0.0 | 0.0 | 0.0  | 0.0 | 0.0  |
| <i>Lonicera morrowii</i>          | 12  | 0.0 | 0.0 | 16.7 | 0.0 | 0.0  |
| <i>Lotus corniculatus</i>         | 161 | 1.9 | 0.6 | 4.3  | 0.0 | 1.2  |
| <i>Lychnis flos-cuculi</i>        | 50  | 8.0 | 2.0 | 10.0 | 0.0 | 6.0  |
| <i>Lycopus americanus</i>         | 2   | 0.0 | 0.0 | 0.0  | 0.0 | 0.0  |
| <i>Lysimachia ciliata</i>         | 2   | 0.0 | 0.0 | 0.0  | 0.0 | 0.0  |
| <i>Lythrum salicaria</i>          | 107 | 0.0 | 0.0 | 0.9  | 0.0 | 0.0  |
| <i>Malva moschata</i>             | 10  | 0.0 | 0.0 | 0.0  | 0.0 | 0.0  |
| <i>Melilotus albus</i>            | 37  | 0.0 | 0.0 | 5.4  | 5.4 | 0.0  |
| <i>Melilotus officinalis</i>      | 22  | 0.0 | 0.0 | 18.2 | 0.0 | 0.0  |
| <i>Mentha arvensis</i>            | 28  | 3.6 | 3.6 | 0.0  | 0.0 | 7.1  |
| <i>Monarda fistulosa</i>          | 53  | 0.0 | 0.0 | 0.0  | 0.0 | 1.9  |
| <i>Oxalis stricta</i>             | 5   | 0.0 | 0.0 | 0.0  | 0.0 | 0.0  |
| <i>Pastinaca sativa</i>           | 8   | 0.0 | 0.0 | 25.0 | 0.0 | 0.0  |
| <i>Penstemon digitalis</i>        | 127 | 1.6 | 1.6 | 4.7  | 0.8 | 4.7  |
| <i>Plantago lanceolata</i>        | 7   | 0.0 | 0.0 | 0.0  | 0.0 | 0.0  |
| <i>Potentilla canadensis</i>      | 14  | 0.0 | 0.0 | 0.0  | 0.0 | 0.0  |
| <i>Potentilla recta</i>           | 109 | 1.8 | 0.0 | 2.8  | 0.9 | 0.0  |
| <i>Potentilla simplex</i>         | 5   | 0.0 | 0.0 | 0.0  | 0.0 | 0.0  |
| <i>Prunella vulgaris</i>          | 36  | 0.0 | 0.0 | 0.0  | 0.0 | 0.0  |
| <i>Pycnanthemum tenuifolium</i>   | 79  | 0.0 | 0.0 | 0.0  | 0.0 | 0.0  |
| <i>Ranunculus acris</i>           | 184 | 1.6 | 0.0 | 1.6  | 1.6 | 4.9  |
| <i>Rosa multiflora</i>            | 58  | 0.0 | 0.0 | 3.4  | 1.7 | 0.0  |
| <i>Rubus allegheniensis</i>       | 78  | 1.3 | 0.0 | 1.3  | 1.3 | 1.3  |
| <i>Rubus hispidus</i>             | 8   | 0.0 | 0.0 | 0.0  | 0.0 | 0.0  |
| <i>Rudbeckia hirta</i>            | 18  | 0.0 | 0.0 | 5.6  | 0.0 | 0.0  |
| <i>Rumex crispus</i>              | 1   | 0.0 | 0.0 | 0.0  | 0.0 | 0.0  |
| <i>Salix sp.</i>                  | 23  | 0.0 | 0.0 | 0.0  | 0.0 | 0.0  |
| <i>Silphium perfoliatum</i>       | 16  | 0.0 | 0.0 | 0.0  | 0.0 | 0.0  |
| <i>Sisyrinchium angustifolium</i> | 3   | 0.0 | 0.0 | 0.0  | 0.0 | 0.0  |
| <i>Sisyrinchium montanum</i>      | 17  | 0.0 | 0.0 | 0.0  | 0.0 | 23.5 |
| <i>Solidago graminifolia</i>      | 44  | 0.0 | 0.0 | 0.0  | 0.0 | 0.0  |
| <i>Solidago juncea</i>            | 64  | 6.3 | 0.0 | 1.6  | 0.0 | 3.1  |
| <i>Solidago nemoralis</i>         | 28  | 0.0 | 0.0 | 0.0  | 3.6 | 0.0  |
| <i>Solidago rugosa</i>            | 37  | 2.7 | 0.0 | 0.0  | 2.7 | 5.4  |
| <i>Stellaria pubera</i>           | 24  | 4.2 | 4.2 | 4.2  | 0.0 | 20.8 |
| <i>Stellaria sp.</i>              | 8   | 0.0 | 0.0 | 0.0  | 0.0 | 37.5 |

|                                     |    |     |      |      |      |      |
|-------------------------------------|----|-----|------|------|------|------|
| <i>Symphyotrichum ericoides</i>     | 19 | 0.0 | 0.0  | 5.3  | 0.0  | 0.0  |
| <i>Symphyotrichum lateriflorum</i>  | 24 | 4.2 | 0.0  | 4.2  | 0.0  | 0.0  |
| <i>Symphyotrichum novae-angliae</i> | 3  | 0.0 | 0.0  | 0.0  | 0.0  | 0.0  |
| <i>Symphyotrichum novae-belgii</i>  | 13 | 0.0 | 0.0  | 0.0  | 0.0  | 0.0  |
| <i>Taraxacum officinale</i>         | 27 | 0.0 | 0.0  | 0.0  | 3.7  | 3.7  |
| <i>Trifolium aureum</i>             | 3  | 0.0 | 0.0  | 0.0  | 33.3 | 0.0  |
| <i>Trifolium pratense</i>           | 10 | 0.0 | 0.0  | 0.0  | 0.0  | 0.0  |
| <i>Trifolium repens</i>             | 33 | 3.0 | 3.0  | 12.1 | 3.0  | 6.1  |
| <i>Veronica officinalis</i>         | 4  | 0.0 | 0.0  | 25.0 | 0.0  | 0.0  |
| <i>Veronica persica</i>             | 24 | 0.0 | 0.0  | 12.5 | 0.0  | 0.0  |
| <i>Veronica serpyllifolia</i>       | 10 | 0.0 | 0.0  | 0.0  | 0.0  | 0.0  |
| <i>Vicia cracca</i>                 | 26 | 3.8 | 0.0  | 0.0  | 0.0  | 0.0  |
| <i>Vicia tetrasperma</i>            | 8  | 0.0 | 12.5 | 0.0  | 0.0  | 25.0 |

74

75

76 **Supplementary Table 3 | Parasite prevalence among the 110 species of bees that were**  
 77 **screened.** (*n* = 2,685 individual bees were screened in total.)  
 78

| Bee species                   | Samples screened | Percent positive with <i>Nosema bombi</i> | Percent positive with <i>Nosema ceranae</i> | Percent positive with <i>Crithidia bombi</i> | Percent positive with <i>Crithidia expoeki</i> | Percent positive with <i>Neogregarines</i> |
|-------------------------------|------------------|-------------------------------------------|---------------------------------------------|----------------------------------------------|------------------------------------------------|--------------------------------------------|
| <i>Agapostemon splendens</i>  | 1                | 0.0                                       | 0.0                                         | 0.0                                          | 0.0                                            | 0.0                                        |
| <i>Agapostemon virescens</i>  | 6                | 0.0                                       | 0.0                                         | 0.0                                          | 0.0                                            | 0.0                                        |
| <i>Andrena carlini</i>        | 7                | 0.0                                       | 0.0                                         | 0.0                                          | 0.0                                            | 14.3                                       |
| <i>Andrena crataegi</i>       | 2                | 0.0                                       | 0.0                                         | 0.0                                          | 0.0                                            | 0.0                                        |
| <i>Andrena cressonii</i>      | 4                | 0.0                                       | 0.0                                         | 0.0                                          | 0.0                                            | 0.0                                        |
| <i>Andrena forbessi</i>       | 3                | 0.0                                       | 0.0                                         | 0.0                                          | 0.0                                            | 0.0                                        |
| <i>Andrena frigida</i>        | 1                | 0.0                                       | 0.0                                         | 0.0                                          | 0.0                                            | 0.0                                        |
| <i>Andrena hippotes</i>       | 3                | 0.0                                       | 0.0                                         | 0.0                                          | 0.0                                            | 0.0                                        |
| <i>Andrena hirticincta</i>    | 4                | 0.0                                       | 0.0                                         | 0.0                                          | 0.0                                            | 0.0                                        |
| <i>Andrena imitatrix</i>      | 2                | 0.0                                       | 0.0                                         | 0.0                                          | 0.0                                            | 0.0                                        |
| <i>Andrena milwaukeensis</i>  | 2                | 0.0                                       | 0.0                                         | 0.0                                          | 0.0                                            | 0.0                                        |
| <i>Andrena nasonii</i>        | 44               | 0.0                                       | 0.0                                         | 0.0                                          | 0.0                                            | 13.6                                       |
| <i>Andrena nivalis</i>        | 4                | 0.0                                       | 50.0                                        | 0.0                                          | 0.0                                            | 0.0                                        |
| <i>Andrena nuda</i>           | 1                | 0.0                                       | 0.0                                         | 0.0                                          | 0.0                                            | 0.0                                        |
| <i>Andrena perplexa</i>       | 10               | 0.0                                       | 0.0                                         | 0.0                                          | 0.0                                            | 0.0                                        |
| <i>Andrena platyparia</i>     | 1                | 0.0                                       | 0.0                                         | 0.0                                          | 0.0                                            | 0.0                                        |
| <i>Andrena pruni</i>          | 6                | 0.0                                       | 0.0                                         | 0.0                                          | 0.0                                            | 16.7                                       |
| <i>Andrena rugosa</i>         | 1                | 0.0                                       | 0.0                                         | 0.0                                          | 0.0                                            | 0.0                                        |
| <i>Andrena simplex</i>        | 2                | 0.0                                       | 0.0                                         | 0.0                                          | 0.0                                            | 50.0                                       |
| <i>Andrena spp.</i>           | 8                | 0.0                                       | 0.0                                         | 0.0                                          | 0.0                                            | 0.0                                        |
| <i>Andrena wilkella</i>       | 50               | 0.0                                       | 2.0                                         | 0.0                                          | 0.0                                            | 2.0                                        |
| <i>Anthidiellum notatum</i>   | 1                | 0.0                                       | 0.0                                         | 0.0                                          | 0.0                                            | 0.0                                        |
| <i>Anthidium manicatum</i>    | 1                | 0.0                                       | 0.0                                         | 0.0                                          | 0.0                                            | 0.0                                        |
| <i>Anthophora bomboides</i>   | 1                | 0.0                                       | 0.0                                         | 0.0                                          | 0.0                                            | 0.0                                        |
| <i>Anthophora terminalis</i>  | 17               | 0.0                                       | 0.0                                         | 0.0                                          | 0.0                                            | 5.9                                        |
| <i>Apis mellifera</i>         | 632              | 0.9                                       | 18.8                                        | 0.3                                          | 0.5                                            | 4.0                                        |
| <i>Augochlora pura</i>        | 20               | 0.0                                       | 0.0                                         | 10.0                                         | 0.0                                            | 15.0                                       |
| <i>Augochlorella aurata</i>   | 79               | 0.0                                       | 0.0                                         | 1.3                                          | 0.0                                            | 1.3                                        |
| <i>Augochloropsis fulgida</i> | 8                | 0.0                                       | 0.0                                         | 0.0                                          | 0.0                                            | 0.0                                        |
| <i>Bombus bimaculatus</i>     | 56               | 1.8                                       | 0.0                                         | 10.7                                         | 12.5                                           | 1.8                                        |
| <i>Bombus borealis</i>        | 5                | 0.0                                       | 0.0                                         | 0.0                                          | 0.0                                            | 0.0                                        |
| <i>Bombus fervidus</i>        | 9                | 0.0                                       | 11.1                                        | 0.0                                          | 0.0                                            | 22.2                                       |
| <i>Bombus griseocollis</i>    | 45               | 0.0                                       | 0.0                                         | 22.2                                         | 2.2                                            | 0.0                                        |
| <i>Bombus impatiens</i>       | 345              | 0.0                                       | 0.9                                         | 11.0                                         | 1.4                                            | 9.6                                        |
| <i>Bombus perplexus</i>       | 2                | 50.0                                      | 50.0                                        | 0.0                                          | 0.0                                            | 0.0                                        |



|                                            |     |     |     |      |      |       |
|--------------------------------------------|-----|-----|-----|------|------|-------|
| <i>Bombus rufocinctus</i>                  | 1   | 0.0 | 0.0 | 0.0  | 0.0  | 0.0   |
| <i>Bombus sandersoni</i>                   | 16  | 6.3 | 0.0 | 0.0  | 6.3  | 0.0   |
| <i>Bombus ternarius</i>                    | 4   | 0.0 | 0.0 | 0.0  | 0.0  | 0.0   |
| <i>Bombus vagans</i>                       | 22  | 0.0 | 0.0 | 4.5  | 27.3 | 18.2  |
| <i>Ceratina calcarata</i>                  | 142 | 0.0 | 0.0 | 0.7  | 0.0  | 2.8   |
| <i>Ceratina dupla</i>                      | 142 | 0.0 | 0.0 | 0.0  | 0.0  | 1.4   |
| <i>Ceratina mikmaqi</i>                    | 154 | 0.0 | 0.6 | 1.9  | 0.0  | 0.6   |
| <i>Ceratina spp.</i>                       | 28  | 0.0 | 3.6 | 0.0  | 0.0  | 0.0   |
| <i>Ceratina strenua</i>                    | 10  | 0.0 | 0.0 | 0.0  | 0.0  | 0.0   |
| <i>Coelioxys banksi</i>                    | 1   | 0.0 | 0.0 | 0.0  | 0.0  | 0.0   |
| <i>Coelioxys modesta</i>                   | 1   | 0.0 | 0.0 | 0.0  | 0.0  | 0.0   |
| <i>Coelioxys moesta</i>                    | 2   | 0.0 | 0.0 | 0.0  | 0.0  | 0.0   |
| <i>Coelioxys rufitarsis</i>                | 1   | 0.0 | 0.0 | 0.0  | 0.0  | 100.0 |
| <i>Colletes inaequalis</i>                 | 1   | 0.0 | 0.0 | 0.0  | 0.0  | 0.0   |
| <i>Colletes simulans</i>                   | 3   | 0.0 | 0.0 | 33.3 | 0.0  | 0.0   |
| <i>Colletes solidaginis</i>                | 1   | 0.0 | 0.0 | 0.0  | 0.0  | 0.0   |
| <i>Halictus confusus</i>                   | 12  | 0.0 | 0.0 | 0.0  | 0.0  | 0.0   |
| <i>Halictus ligatus</i>                    | 41  | 0.0 | 0.0 | 0.0  | 0.0  | 0.0   |
| <i>Halictus rubicundus</i>                 | 10  | 0.0 | 0.0 | 0.0  | 0.0  | 10.0  |
| <i>Heriades carinatus</i>                  | 14  | 0.0 | 0.0 | 0.0  | 0.0  | 0.0   |
| <i>Heriades spp.</i>                       | 3   | 0.0 | 0.0 | 0.0  | 0.0  | 0.0   |
| <i>Hoplitis pilosifrons</i>                | 5   | 0.0 | 0.0 | 0.0  | 0.0  | 0.0   |
| <i>Hoplitis producta</i>                   | 8   | 0.0 | 0.0 | 0.0  | 0.0  | 37.5  |
| <i>Hoplitis simplex</i>                    | 1   | 0.0 | 0.0 | 0.0  | 0.0  | 0.0   |
| <i>Hoplitis spoliata</i>                   | 1   | 0.0 | 0.0 | 0.0  | 0.0  | 0.0   |
| <i>Hoplitis spp.</i>                       | 1   | 0.0 | 0.0 | 0.0  | 0.0  | 0.0   |
| <i>Hylaeus affinis</i>                     | 9   | 0.0 | 0.0 | 0.0  | 0.0  | 0.0   |
| <i>Hylaeus affinis/modestus</i><br>group   | 8   | 0.0 | 0.0 | 0.0  | 0.0  | 0.0   |
| <i>Hylaeus annulatus</i>                   | 11  | 0.0 | 0.0 | 0.0  | 0.0  | 0.0   |
| <i>Hylaeus illinoisensis</i>               | 39  | 0.0 | 0.0 | 0.0  | 0.0  | 5.1   |
| <i>Hylaeus mesillae</i>                    | 21  | 0.0 | 0.0 | 0.0  | 0.0  | 0.0   |
| <i>Hylaeus sp. 1</i>                       | 3   | 0.0 | 0.0 | 0.0  | 0.0  | 0.0   |
| <i>Hylaeus spp.</i>                        | 33  | 0.0 | 0.0 | 0.0  | 0.0  | 3.0   |
| <i>Lasioglossum albipenne</i>              | 20  | 0.0 | 0.0 | 0.0  | 0.0  | 0.0   |
| <i>Lasioglossum coeruleum</i>              | 1   | 0.0 | 0.0 | 0.0  | 0.0  | 0.0   |
| <i>Lasioglossum coriaceum</i>              | 16  | 0.0 | 0.0 | 0.0  | 0.0  | 0.0   |
| <i>Lasioglossum cressonii</i>              | 28  | 0.0 | 0.0 | 0.0  | 0.0  | 0.0   |
| <i>Lasioglossum dreisbachi</i>             | 1   | 0.0 | 0.0 | 0.0  | 0.0  | 0.0   |
| <i>Lasioglossum</i><br><i>leucozonium</i>  | 23  | 0.0 | 0.0 | 0.0  | 0.0  | 4.3   |
| <i>Lasioglossum lineatulum</i>             | 2   | 0.0 | 0.0 | 0.0  | 0.0  | 0.0   |
| <i>Lasioglossum</i><br><i>macoupinense</i> | 1   | 0.0 | 0.0 | 0.0  | 0.0  | 0.0   |

|                                   |     |     |     |      |     |       |
|-----------------------------------|-----|-----|-----|------|-----|-------|
| <i>Lasioglossum michiganense</i>  | 1   | 0.0 | 0.0 | 0.0  | 0.0 | 100.0 |
| <i>Lasioglossum mitchelli</i>     | 3   | 0.0 | 0.0 | 0.0  | 0.0 | 0.0   |
| <i>Lasioglossum nigroviride</i>   | 2   | 0.0 | 0.0 | 0.0  | 0.0 | 0.0   |
| <i>Lasioglossum nymphaearum</i>   | 4   | 0.0 | 0.0 | 0.0  | 0.0 | 0.0   |
| <i>Lasioglossum obscurum</i>      | 3   | 0.0 | 0.0 | 0.0  | 0.0 | 0.0   |
| <i>Lasioglossum pectinatum</i>    | 1   | 0.0 | 0.0 | 0.0  | 0.0 | 0.0   |
| <i>Lasioglossum quebecense</i>    | 4   | 0.0 | 0.0 | 0.0  | 0.0 | 0.0   |
| <i>Lasioglossum spp.</i>          | 126 | 0.0 | 0.0 | 0.0  | 0.0 | 0.8   |
| <i>Lasioglossum versans</i>       | 3   | 0.0 | 0.0 | 0.0  | 0.0 | 0.0   |
| <i>Lasioglossum versatum</i>      | 141 | 0.0 | 0.7 | 0.0  | 0.0 | 0.7   |
| <i>Lasioglossum weemsi</i>        | 3   | 0.0 | 0.0 | 0.0  | 0.0 | 0.0   |
| <i>Lasioglossum zonulum</i>       | 37  | 0.0 | 0.0 | 2.7  | 2.7 | 0.0   |
| <i>Megachile brevis</i>           | 1   | 0.0 | 0.0 | 0.0  | 0.0 | 0.0   |
| <i>Megachile campanulae</i>       | 7   | 0.0 | 0.0 | 0.0  | 0.0 | 0.0   |
| <i>Megachile centuncularis</i>    | 3   | 0.0 | 0.0 | 0.0  | 0.0 | 0.0   |
| <i>Megachile gemula</i>           | 2   | 0.0 | 0.0 | 0.0  | 0.0 | 50.0  |
| <i>Megachile latimanus</i>        | 2   | 0.0 | 0.0 | 0.0  | 0.0 | 50.0  |
| <i>Megachile mendica</i>          | 7   | 0.0 | 0.0 | 0.0  | 0.0 | 0.0   |
| <i>Megachile montivaga</i>        | 9   | 0.0 | 0.0 | 11.1 | 0.0 | 0.0   |
| <i>Megachile pugnata</i>          | 2   | 0.0 | 0.0 | 0.0  | 0.0 | 0.0   |
| <i>Megachile relativa</i>         | 7   | 0.0 | 0.0 | 0.0  | 0.0 | 14.3  |
| <i>Megachile rotundata</i>        | 1   | 0.0 | 0.0 | 0.0  | 0.0 | 0.0   |
| <i>Megachile sculpturalis</i>     | 3   | 0.0 | 0.0 | 0.0  | 0.0 | 33.3  |
| <i>Melissodes desponsa</i>        | 4   | 0.0 | 0.0 | 0.0  | 0.0 | 0.0   |
| <i>Melissodes druriella</i>       | 4   | 0.0 | 0.0 | 0.0  | 0.0 | 0.0   |
| <i>Melissodes spp.</i>            | 4   | 0.0 | 0.0 | 0.0  | 0.0 | 0.0   |
| <i>Melissodes subillata</i>       | 3   | 0.0 | 0.0 | 0.0  | 0.0 | 0.0   |
| <i>Nomada luteoloides</i>         | 1   | 0.0 | 0.0 | 0.0  | 0.0 | 0.0   |
| <i>Nomada pygmaea group</i>       | 1   | 0.0 | 0.0 | 0.0  | 0.0 | 0.0   |
| <i>Nomada sp. 1</i>               | 1   | 0.0 | 0.0 | 0.0  | 0.0 | 0.0   |
| <i>Nomada sp. 2</i>               | 2   | 0.0 | 0.0 | 0.0  | 0.0 | 0.0   |
| <i>Nomada sp. 3</i>               | 1   | 0.0 | 0.0 | 0.0  | 0.0 | 0.0   |
| <i>Nomada sp. 4</i>               | 3   | 0.0 | 0.0 | 0.0  | 0.0 | 0.0   |
| <i>Nomada spp.</i>                | 1   | 0.0 | 0.0 | 0.0  | 0.0 | 0.0   |
| <i>Osmia atriventris</i>          | 1   | 0.0 | 0.0 | 0.0  | 0.0 | 0.0   |
| <i>Osmia bucephala</i>            | 1   | 0.0 | 0.0 | 0.0  | 0.0 | 0.0   |
| <i>Osmia georgica</i>             | 1   | 0.0 | 0.0 | 0.0  | 0.0 | 0.0   |
| <i>Osmia nigriventris</i>         | 2   | 0.0 | 0.0 | 0.0  | 0.0 | 0.0   |
| <i>Osmia pumila</i>               | 1   | 0.0 | 0.0 | 0.0  | 0.0 | 0.0   |
| <i>Pseudopanurgus andrenoides</i> | 2   | 0.0 | 0.0 | 0.0  | 0.0 | 0.0   |
| <i>Sphecodes aroniae</i>          | 1   | 0.0 | 0.0 | 0.0  | 0.0 | 0.0   |

|                            |    |     |     |     |     |      |
|----------------------------|----|-----|-----|-----|-----|------|
| <i>Sphecodes carolinus</i> | 1  | 0.0 | 0.0 | 0.0 | 0.0 | 0.0  |
| <i>Stelis lateralis</i>    | 1  | 0.0 | 0.0 | 0.0 | 0.0 | 0.0  |
| <i>Xylocopa virginica</i>  | 40 | 0.0 | 2.5 | 2.5 | 5.0 | 10.0 |

79

80 **Supplementary Table 4 | Effects of week number on the prevalence of parasite**  
81 **groups/species in the pollinator community.** GLMMs were fitted with parasite prevalence  
82 as binomial response, week number as predictor, and site as random factor. Significance of  
83 week number were evaluated using likelihood ratio tests. To account for multiple testing given  
84 the number of parasite groups/species, we used a Bonferroni-corrected significance level of  $\alpha$   
85 =  $0.05/7 = 0.0071$ . Significant positive effects are shown in blue. Durbin-Watson tests using  
86 scaled residuals were also conducted to check for temporal autocorrelation; a significant  
87 temporal autocorrelation would have invalidated the use of a non-autoregressive model like  
88 GLMM. The last parasite group refers to all four parasite species and neogregarines combined.  
89 Parasite groups/species with less than 20 positive samples were excluded from the analysis.  
90 Sample size was  $n = 2,672$ .

91

| Parasite               | Likelihood ratio test |                |         | DW test for temporal autocorr. |         |
|------------------------|-----------------------|----------------|---------|--------------------------------|---------|
|                        | Coef. est.            | $\chi^2_1$     | p-value | DW                             | p-value |
| <b>Microsporidia</b>   | 0.65                  | 17             | < 0.001 | 2.0                            | 0.97    |
| <b>Trypanosomatids</b> | 0.11                  | 45             | < 0.001 | 2.4                            | 0.39    |
| <i>N. bombi</i>        |                       | < 20 positives |         |                                |         |
| <i>N. ceranae</i>      | 0.068                 | 14             | < 0.001 | 2.0                            | 0.93    |
| <i>C. bombi</i>        | 0.17                  | 39             | < 0.001 | 1.9                            | 0.8     |
| <i>C. expoeki</i>      | 0.071                 | 2.9            | 0.087   | 1.5                            | 0.24    |
| <b>Neogregarines</b>   | 0.055                 | 7.6            | 0.0059  | 1.8                            | 0.58    |
| <b>Combined</b>        | 0.092                 | 56             | < 0.001 | 1.6                            | 0.36    |

92

93 **Supplementary Table 5 | Effects of week number on the prevalence of parasite**  
 94 **groups/species in the floral community.** GLMMs were fitted with parasite prevalence as  
 95 binomial response, week number as predictor, and site as random factor. Significance of week  
 96 number were evaluated using likelihood ratio tests. To account for multiple testing given the  
 97 number of parasite groups/species, we used a Bonferroni-corrected significance level of  $\alpha =$   
 98  $0.05/7 = 0.0071$ . Significant negative effects are shown in red. Durbin-Watson tests using  
 99 scaled residuals were also conducted to check for temporal autocorrelation. Parasite  
 100 groups/species with less than 20 positive samples were excluded from the analysis.  
 101

| Parasite               | Likelihood ratio test |            |               | DW test for temporal autocorr. |            |
|------------------------|-----------------------|------------|---------------|--------------------------------|------------|
|                        | Coef. est.            | $\chi^2_1$ |               | Coef. est.                     | $\chi^2_1$ |
| <b>Microsporidia</b>   | -0.028                | 2.9        | 0.090         | 1.5                            | 0.28       |
| <b>Trypanosomatids</b> | -0.017                | 1.6        | 0.21          | 2.7                            | 0.11       |
| <i>N. bombi</i>        | -0.019                | 0.50       | 0.48          | 2.4                            | 0.3        |
| <i>N. ceranae</i>      | < 20 positives        |            |               |                                |            |
| <i>C. bombi</i>        | -0.035                | 2.8        | 0.092         | 2.0                            | 0.93       |
| <i>C. expoeki</i>      | -0.017                | 0.26       | 0.61          | 2.0                            | 0.92       |
| <b>Neogregarines</b>   | -0.036                | 2.8        | 0.096         | 1.6                            | 0.42       |
| <b>Combined</b>        | <b>-0.038</b>         | <b>8.3</b> | <b>0.0040</b> | 2.2                            | 0.58       |

102

103 **Supplementary Table 6 | Effects of bee genus and its interaction with week number on**  
 104 **the prevalence of parasite groups/species in the pollinator community.** GLMMs were fitted  
 105 with parasite prevalence in each genus as binomial response, week number (shifted), pollinator  
 106 genus and their interaction as predictors, and site as random factor. To account for multiple  
 107 testing, we used a Bonferroni-corrected significance level of  $\alpha = 0.05/7 = 0.0071$ . Significance  
 108 of predictors were evaluated using likelihood ratio tests. Significant effects are shown in  
 109 **fuschia**. Note that none of the *Ceratina* samples tested positive for *C. expoeki* and were hence  
 110 excluded from the *C. expoeki* analysis, since they would have otherwise led to model  
 111 degeneracy. Sample size was  $n = 2,196$  for *C. expoeki*, and  $n = 2,672$  for all other parasite  
 112 groups/species.  
 113

| Parasite          | Week * genus |         | Genus      |         |
|-------------------|--------------|---------|------------|---------|
|                   | $\chi^2_1$   | p-value | $\chi^2_1$ | p-value |
| Microsporidia     | 1.4          | 0.85    | 200        | < 0.001 |
| Trypanosomatids   | 35           | < 0.001 | 160        | < 0.001 |
| <i>N. ceranae</i> | 2.2          | 0.70    | 230        | < 0.001 |
| <i>C. bombi</i>   | 15           | 0.0057  | 140        | < 0.001 |
| <i>C. expoeki</i> | 8.2          | 0.042   | 28         | < 0.001 |
| Neogregarines     | 4.3          | 0.37    | 47         | < 0.001 |
| Combined          | 31           | < 0.001 | 230        | < 0.001 |

114

115 **Supplementary Table 7 | Post-hoc pairwise contrasts for the main effects of bee genus.**  
 116 Results were based on the same models used in Supplementary Table 6. p-values were  
 117 calculated using the simultaneous inference procedure by Hothorn, Bretz and Westfall (2008),  
 118 which incorporated corrections for multiple testing given the number of contrasts. In addition,  
 119 we used a Bonferroni-corrected significance level of  $\alpha = 0.05/7 = 0.0071$  to account for the  
 120 number of parasite groups/species. Significant positive and negative contrasts are shown in  
 121 blue and red respectively.  
 122

| Parasite                 | Pairwise contrast                     | Coef. est. | z                                   | p-value |
|--------------------------|---------------------------------------|------------|-------------------------------------|---------|
| <b>Microsporidia</b>     | <i>Apis</i> - <i>Bombus</i>           | 1.5        | 6.4                                 | < 0.001 |
|                          | <i>Apis</i> - <i>Ceratina</i>         | 4.2        | 5.2                                 | < 0.001 |
|                          | <i>Apis</i> - <i>Lasioglossum</i>     | 2.4        | 6.6                                 | < 0.001 |
|                          | <i>Apis</i> - Others                  | 2.4        | 8.2                                 | < 0.001 |
|                          | <i>Bombus</i> - <i>Ceratina</i>       | 2.7        | 3.2                                 | 0.0090  |
|                          | <i>Bombus</i> - <i>Lasioglossum</i>   | 0.91       | 2.2                                 | 0.15    |
|                          | <i>Bombus</i> - Others                | 0.88       | 2.6                                 | 0.066   |
|                          | <i>Ceratina</i> - <i>Lasioglossum</i> | -1.8       | -2.0                                | 0.23    |
|                          | <i>Ceratina</i> - Others              | -1.8       | -2.1                                | 0.18    |
|                          | <i>Lasioglossum</i> - Others          | -0.035     | -0.078                              | 1.0     |
| <b>Trypanosomatids</b>   | <i>Apis</i> - <i>Bombus</i>           | -1.7       | -7.0                                | < 0.001 |
|                          | <i>Apis</i> - <i>Ceratina</i>         | 1.0        | 2.3                                 | 0.15    |
|                          | <i>Apis</i> - <i>Lasioglossum</i>     | 0.91       | 2.1                                 | 0.22    |
|                          | <i>Apis</i> - Others                  | 0.67       | 1.8                                 | 0.37    |
|                          | <i>Bombus</i> - <i>Ceratina</i>       | 2.7        | 6.6                                 | < 0.001 |
|                          | <i>Bombus</i> - <i>Lasioglossum</i>   | 2.6        | 6.5                                 | < 0.001 |
|                          | <i>Bombus</i> - Others                | 2.4        | 7.1                                 | < 0.001 |
|                          | <i>Ceratina</i> - <i>Lasioglossum</i> | -0.11      | -0.20                               | 1.0     |
|                          | <i>Ceratina</i> - Others              | -0.34      | -0.68                               | 0.96    |
|                          | <i>Lasioglossum</i> - Others          | -0.23      | -0.47                               | 0.99    |
| <b><i>N. ceranae</i></b> | <i>Apis</i> - <i>Bombus</i>           | 3.0        | 6.4                                 | < 0.001 |
|                          | <i>Apis</i> - <i>Ceratina</i>         | 4.0        | 5.0                                 | < 0.001 |
|                          | <i>Apis</i> - <i>Lasioglossum</i>     | 4.6        | 4.0                                 | < 0.001 |
|                          | <i>Apis</i> - Others                  | 3.5        | 6.7                                 | < 0.001 |
|                          | <i>Bombus</i> - <i>Ceratina</i>       | 1.1        | 1.2                                 | 0.74    |
|                          | <i>Bombus</i> - <i>Lasioglossum</i>   | 1.6        | 1.3                                 | 0.64    |
|                          | <i>Bombus</i> - Others                | 0.48       | 0.71                                | 0.95    |
|                          | <i>Ceratina</i> - <i>Lasioglossum</i> | 0.57       | 0.41                                | 0.99    |
|                          | <i>Ceratina</i> - Others              | -0.59      | -0.62                               | 0.97    |
|                          | <i>Lasioglossum</i> - Others          | -1.2       | -0.93                               | 0.87    |
| <b><i>C. bombi</i></b>   | <i>Apis</i> - <i>Bombus</i>           | -4.5       | -4.2                                | < 0.001 |
|                          | <i>Apis</i> - <i>Ceratina</i>         | -1.3       | -1.1                                | 0.78    |
|                          | <i>Apis</i> - <i>Lasioglossum</i>     | 0.46       | 0.20                                | 1.0     |
|                          | <i>Apis</i> - Others                  | -1.2       | -0.93                               | 0.87    |
|                          | <i>Bombus</i> - <i>Ceratina</i>       | 3.2        | 5.1                                 | < 0.001 |
|                          | <i>Bombus</i> - <i>Lasioglossum</i>   | 5.0        | 2.3                                 | 0.11    |
|                          | <i>Bombus</i> - Others                | 3.3        | 4.8                                 | < 0.001 |
|                          | <i>Ceratina</i> - <i>Lasioglossum</i> | 1.8        | 0.82                                | 0.91    |
|                          | <i>Ceratina</i> - Others              | 0.17       | 0.19                                | 1.0     |
|                          | <i>Lasioglossum</i> - Others          | -1.6       | -0.74                               | 0.94    |
| <b><i>C. expoeki</i></b> | <i>Apis</i> - <i>Bombus</i>           | -2.1       | -2.9                                | 0.015   |
|                          | <i>Apis</i> - <i>Ceratina</i>         |            | No positive <i>Ceratina</i> samples |         |
|                          | <i>Apis</i> - <i>Lasioglossum</i>     | 1.5        | 0.71                                | 0.88    |
|                          | <i>Apis</i> - Others                  | 1.3        | 0.85                                | 0.81    |

|                      |                                |       |                                     |         |
|----------------------|--------------------------------|-------|-------------------------------------|---------|
|                      | <i>Bombus - Ceratina</i>       |       | No positive <i>Ceratina</i> samples |         |
|                      | <i>Bombus - Lasioglossum</i>   | 3.7   | 1.8                                 | 0.25    |
|                      | <i>Bombus - Others</i>         | 3.4   | .5                                  | 0.048   |
|                      | <i>Ceratina - Lasioglossum</i> |       | No positive <i>Ceratina</i> samples |         |
|                      | <i>Ceratina - Others</i>       |       | No positive <i>Ceratina</i> samples |         |
|                      | <i>Lasioglossum - Others</i>   | -0.26 | 0.11                                | 1.0     |
| <b>Neogregarines</b> | <i>Apis - Bombus</i>           | -0.89 | -3.2                                | 0.010   |
|                      | <i>Apis - Ceratina</i>         | 1.1   | 2.4                                 | 0.12    |
|                      | <i>Apis - Lasioglossum</i>     | 1.4   | 2.4                                 | 0.093   |
|                      | <i>Apis - Others</i>           | -0.33 | -1.1                                | 0.77    |
|                      | <i>Bombus - Ceratina</i>       | 2.0   | 4.5                                 | < 0.001 |
|                      | <i>Bombus - Lasioglossum</i>   | 2.3   | 4.1                                 | < 0.001 |
|                      | <i>Bombus - Others</i>         | 0.56  | 2.2                                 | 0.16    |
|                      | <i>Ceratina - Lasioglossum</i> | 0.31  | 0.46                                | 0.99    |
|                      | <i>Ceratina - Others</i>       | -1.4  | -3.1                                | 0.013   |
|                      | <i>Lasioglossum - Others</i>   | -1.7  | -3.1                                | 0.015   |
| <b>Combined</b>      | <i>Apis - Bombus</i>           | -0.21 | -1.4                                | 0.60    |
|                      | <i>Apis - Ceratina</i>         | 2.3   | 7.7                                 | < 0.001 |
|                      | <i>Apis - Lasioglossum</i>     | 2.7   | 6.9                                 | < 0.001 |
|                      | <i>Apis - Others</i>           | 1.4   | 6.8                                 | < 0.001 |
|                      | <i>Bombus - Ceratina</i>       | 2.5   | 8.4                                 | < 0.001 |
|                      | <i>Bombus - Lasioglossum</i>   | 2.9   | 7.4                                 | < 0.001 |
|                      | <i>Bombus - Others</i>         | 1.6   | 7.8                                 | < 0.001 |
|                      | <i>Ceratina - Lasioglossum</i> | 0.41  | 0.85                                | 0.90    |
|                      | <i>Ceratina - Others</i>       | -0.98 | -3.0                                | 0.022   |
|                      | <i>Lasioglossum - Others</i>   | -1.4  | -3.3                                | 0.0068  |



124 **Supplementary Table 8 | Effects of week number on parasite prevalence in different bee**  
 125 **genera.** Results were based on the same models used in Supplementary Table 6. p-values were  
 126 calculated using the simultaneous inference procedure by Hothorn, Bretz and Westfall (2008),  
 127 which incorporated corrections for multiple testing given the number of genera. In addition,  
 128 we used a Bonferroni-corrected significance level of  $\alpha = 0.05/7 = 0.0071$  to account for the  
 129 number of parasite groups/species. Significant positive and negative effects are shown in blue  
 130 and red respectively.

131

| Parasite                 | Genus               | Coef. est.                          | z     | p-value |
|--------------------------|---------------------|-------------------------------------|-------|---------|
| <b>Microsporidia</b>     | <i>Apis</i>         | -0.079                              | -3.5  | 0.002   |
|                          | <i>Bombus</i>       | -0.037                              | -0.73 | 0.96    |
|                          | <i>Ceratina</i>     | -0.15                               | -0.81 | 0.93    |
|                          | <i>Lasioglossum</i> | -0.070                              | -0.80 | 0.94    |
|                          | Others              | -0.022                              | -0.35 | 1.0     |
| <b>Trypanosomatids</b>   | <i>Apis</i>         | -0.093                              | -2.3  | 0.094   |
|                          | <i>Bombus</i>       | 0.065                               | 2.0   | 0.21    |
|                          | <i>Ceratina</i>     | -0.14                               | -1.5  | 0.49    |
|                          | <i>Lasioglossum</i> | 0.034                               | 0.32  | 1.0     |
|                          | Others              | 0.26                                | 4.9   | < 0.001 |
| <b><i>N. ceranae</i></b> | <i>Apis</i>         | -0.098                              | -4.1  | < 0.001 |
|                          | <i>Bombus</i>       | 0.049                               | 0.38  | 1       |
|                          | <i>Ceratina</i>     | -0.145                              | -0.80 | 0.94    |
|                          | <i>Lasioglossum</i> | -0.098                              | -0.36 | 1.0     |
|                          | Others              | 0.00041                             | 0.004 | 1.0     |
| <b><i>C. bombi</i></b>   | <i>Apis</i>         | -0.23                               | -1.7  | 0.37    |
|                          | <i>Bombus</i>       | 0.13                                | 2.7   | 0.038   |
|                          | <i>Ceratina</i>     | -0.16                               | -1.3  | 0.69    |
|                          | <i>Lasioglossum</i> | 0.51                                | 1.1   | 0.80    |
|                          | Others              | 0.27                                | 2.6   | 0.043   |
| <b><i>C. expoeki</i></b> | <i>Apis</i>         | -0.099                              | -0.10 | 0.88    |
|                          | <i>Bombus</i>       | -0.10                               | -0.11 | 0.25    |
|                          | <i>Ceratina</i>     | No positive <i>Ceratina</i> samples |       |         |
|                          | <i>Lasioglossum</i> | 0.50                                | 0.5   | 0.70    |
|                          | Others              | 0.32                                | 0.32  | 0.33    |
| <b>Neogregarines</b>     | <i>Apis</i>         | -0.067                              | -1.5  | 0.50    |
|                          | <i>Bombus</i>       | 0.030                               | 0.65  | 0.97    |
|                          | <i>Ceratina</i>     | 0.072                               | 0.89  | 0.90    |
|                          | <i>Lasioglossum</i> | -0.043                              | -0.32 | 1.0     |
|                          | Others              | 0.039                               | 0.94  | 0.88    |
| <b>Combined</b>          | <i>Apis</i>         | -0.11                               | -4.8  | < 0.001 |
|                          | <i>Bombus</i>       | 0.057                               | 1.9   | 0.25    |
|                          | <i>Ceratina</i>     | -0.026                              | -0.40 | 1.00    |
|                          | <i>Lasioglossum</i> | 0.064                               | 0.60  | 0.98    |
|                          | Others              | 0.076                               | 2.1   | 0.16    |

132

133 **Supplementary Table 9 | Effects of bee diversity (Shannon index) on parasite prevalence**  
 134 **in the bee community.** GLMMs were fitted with parasite prevalence as binomial response,  
 135 Shannon index as predictor, and site as random factor. We considered parasite prevalence  
 136 based on all bee genera, as well as without *Apis* and *Bombus*. Significance of pollinator  
 137 diversity were evaluated using likelihood ratio tests. To account for multiple testing, we used  
 138 a Bonferroni-corrected significance level of  $\alpha = 0.05/7 = 0.0071$  for prevalence based on all  
 139 genera, and  $\alpha = 0.05/4 = 0.13$  for prevalence without *Apis* and *Bombus*. Significant negative  
 140 effects are shown in red. Sample size was  $n = 2,446$  for all bee genera, and 1,390 without *Apis*  
 141 and *Bombus*.  
 142

| Parasite          | All bee genera |                |         | Without <i>Apis</i> and <i>Bombus</i> |                |         |
|-------------------|----------------|----------------|---------|---------------------------------------|----------------|---------|
|                   | Coef. est.     | $\chi^2_1$     | p-value | Coef. est.                            | $\chi^2_1$     | p-value |
| Microsporidia     | -0.41          | 7.4            | 0.0065  | 0.52                                  | 0.54           | 0.46    |
| Trypanosomatids   | -0.74          | 21             | < 0.001 | -1.8                                  | 22             | < 0.001 |
| <i>N. bombi</i>   |                | < 20 positives |         |                                       | < 20 positives |         |
| <i>N. ceranae</i> | -0.64          | 13             | < 0.001 |                                       | < 20 positives |         |
| <i>C. bombi</i>   | -1.1           | 21             | < 0.001 |                                       | < 20 positives |         |
| <i>C. expoeki</i> | -0.0056        | 0.00016        | 0.99    |                                       | < 20 positives |         |
| Neogregarines     | -0.37          | 3.6            | 0.060   | 0.020                                 | 0.0014         | 0.97    |
| Combined          | -0.69          | 34             | < 0.001 | -0.64                                 | 2.6            | 0.11    |

143 **Supplementary Table 10 | Effects of floral diversity (Shannon index) on parasite**  
 144 **prevalence in the floral community.** GLMMs were fitted with parasite prevalence as  
 145 binomial response, Shannon index as predictor, and site as random factor. Significance of floral  
 146 diversity were evaluated using likelihood ratio tests. To account for multiple testing, we used  
 147 a Bonferroni-corrected significance level of  $\alpha = 0.05/7 = 0.0071$ . Sample size was  $n = 2,624$ .  
 148  
 149

| Parasite          | Coef. est. | $\chi^2_1$     | p-value |
|-------------------|------------|----------------|---------|
| Microsporidia     | 0.34       | 4.0            | 0.045   |
| Trypanosomatids   | -0.15      | 1.1            | 0.30    |
| <i>N. bombi</i>   | 0.088      | 0.10           | 0.75    |
| <i>N. ceranae</i> |            | < 20 positives |         |
| <i>C. bombi</i>   | -0.090     | 0.16           | 0.69    |
| <i>C. expoeki</i> | 0.063      | 0.031          | 0.86    |
| Neogregarines     | -0.56      | 6.3            | 0.012   |
| Combined          | -0.16      | 1.3            | 0.25    |

150

151 **Supplementary Table 11 | Effects of total floral abundance on parasite prevalence in the**  
 152 **floral community.** GLMMs were fitted with parasite prevalence as binomial response,  
 153  $\log_{10}$ (mean total floral abundance per quadrat) as predictor, and site as random factor.  
 154 Significance of floral abundance were evaluated using likelihood ratio tests. To account for  
 155 multiple testing, we used a Bonferroni-corrected significance level of  $\alpha = 0.05/7 = 0.0071$ .  
 156 Significant negative effects are shown in **red**. Sample size was  $n = 2,624$ .  
 157

| Parasite               | Coef. est.   | $\chi^2_1$     | p-value       |
|------------------------|--------------|----------------|---------------|
| <b>Microsporidia</b>   | -0.26        | 2.2            | 0.14          |
| <b>Trypanosomatids</b> | -0.17        | 1.2            | 0.27          |
| <i>N. bombi</i>        | -0.23        | 0.68           | 0.41          |
| <i>N. ceranae</i>      |              | < 20 positives |               |
| <i>C. bombi</i>        | -0.41        | 3.3            | 0.068         |
| <i>C. expoeki</i>      | -0.40        | 1.2            | 0.28          |
| <b>Neogregarines</b>   | -0.19        | 0.74           | 0.39          |
| <b>Combined</b>        | <b>-0.39</b> | <b>8.0</b>     | <b>0.0046</b> |

158

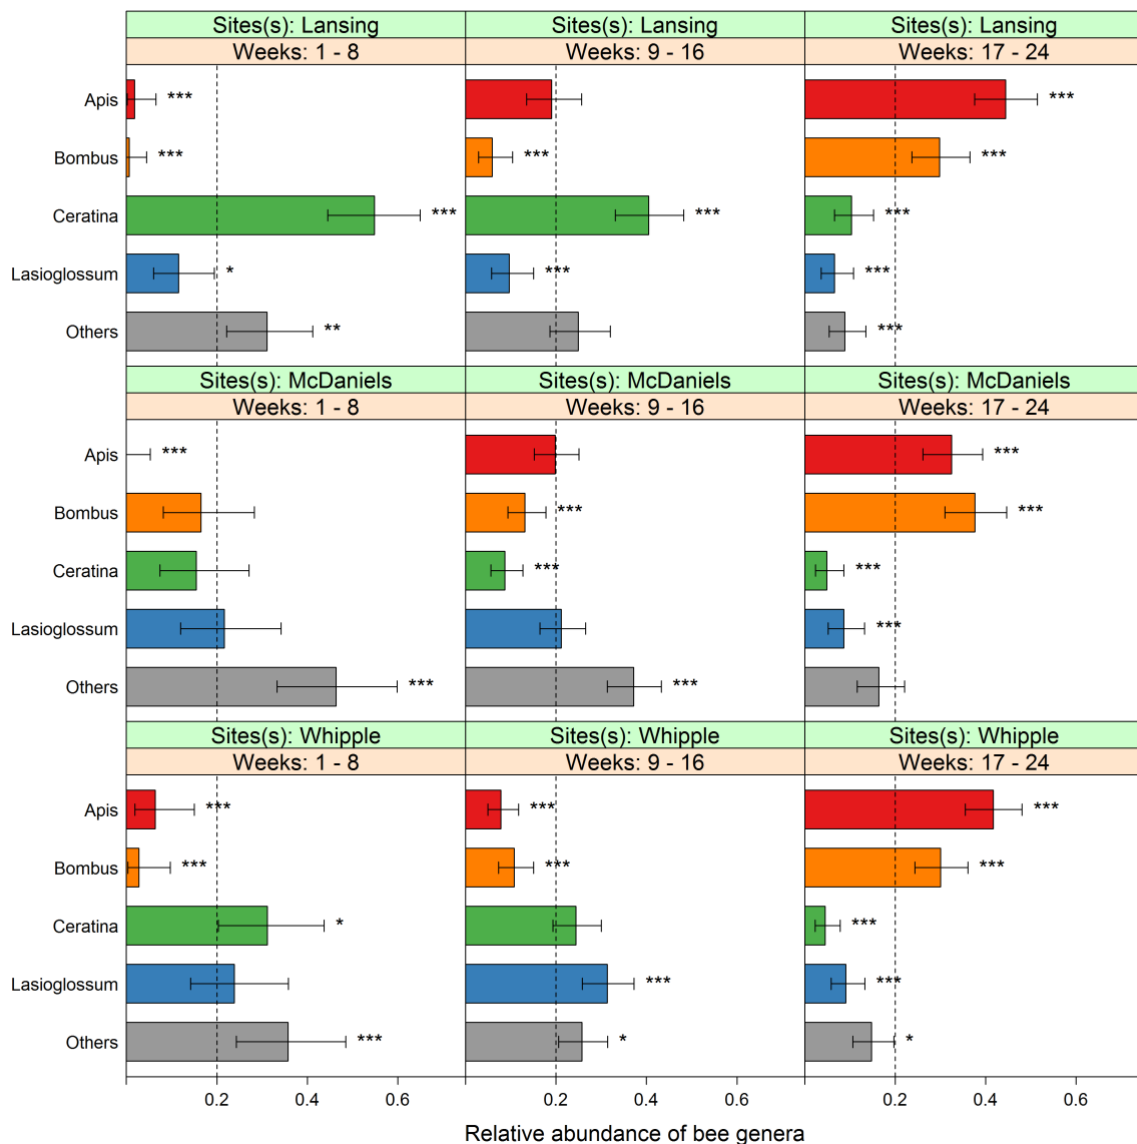

159  
 160  
 161  
 162  
 163  
 164  
 165  
 166  
 167

**Supplementary Fig. 1 | Relative abundance of the four most common bee genera, in three 8-week periods of the field season.** For each genus, post-hoc evaluations of the deviation from the null hypothesis (of equal multinomial proportions) were conducted using exact binomial tests with Bonferroni correction. 99% confidence intervals are presented here in accordance with this correction. Error bars are 95% Clopper-Pearson confidence intervals. Sample sizes are  $n = 164, 289, 349$  for the three periods at Lansing,  $n = 97, 449, 348$  at McDaniels, and  $n = 109, 447, 420$  at Whipple.

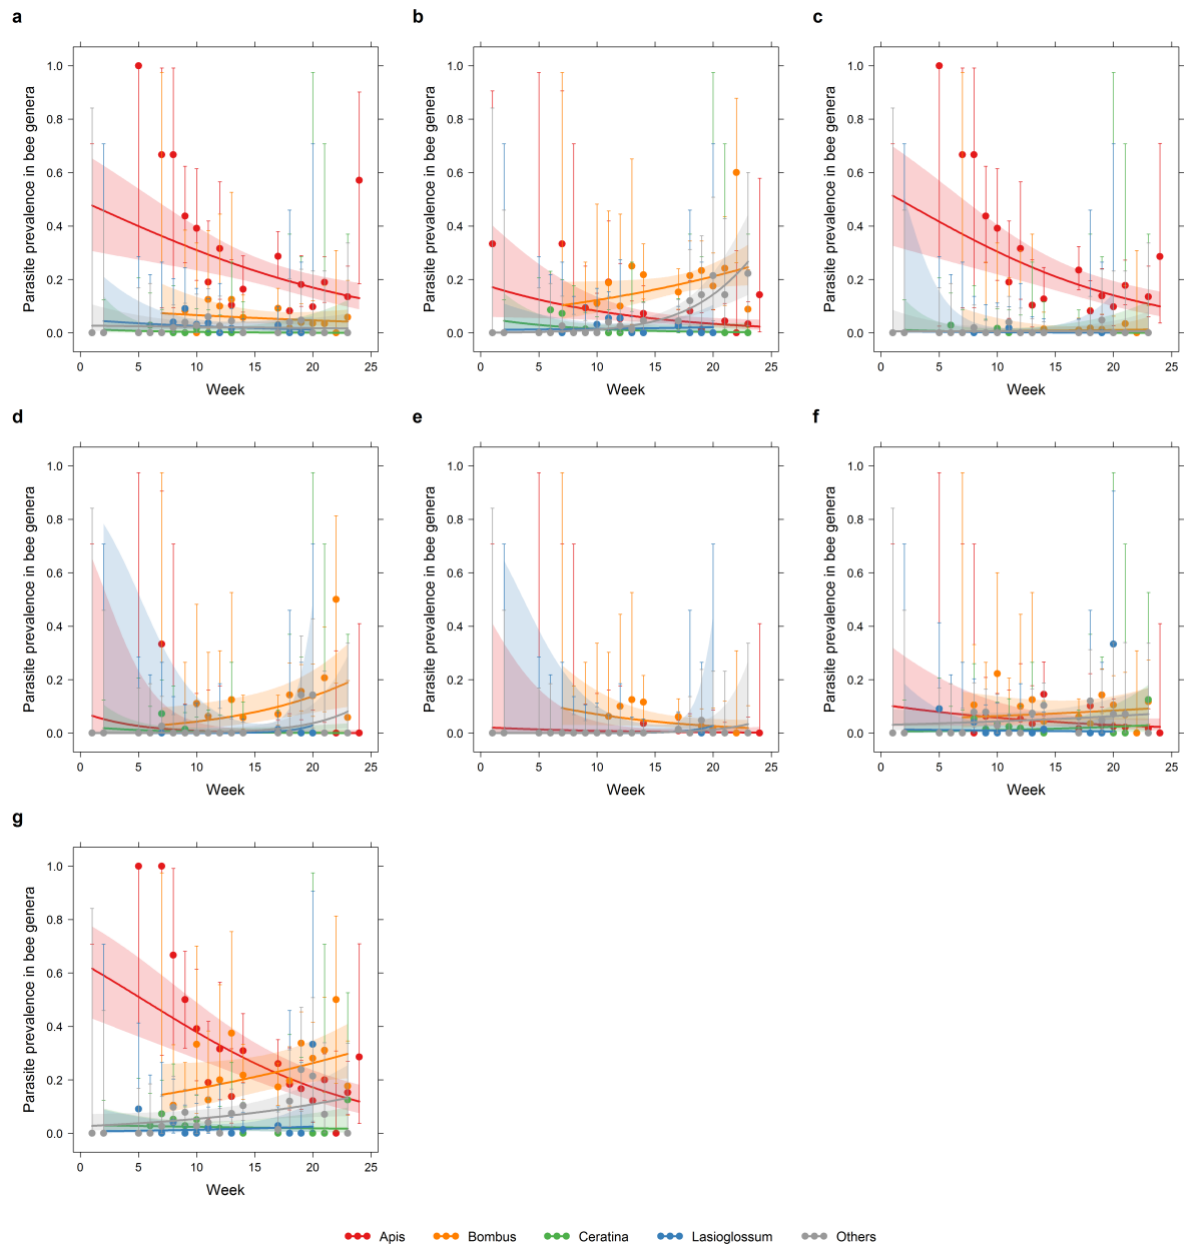

168

169 **Supplementary Fig. 2 | Parasite prevalence in different bee genera across the season.**

170 Parasite species/groups shown here are (a) microsporidians, (b) trypanosomatids, (c) *N.*  
 171 *ceranae*, (d) *C. bombi*, (e) *C. expoeki*, (f) neogregarines and (g) the four parasite species and  
 172 neogregarines combined. Curves and confidence bands were fitted using binomial GLMMs  
 173 with genus, week number and their interactions as predictors, and site as a random factor. To  
 174 reduce plot clutter, points and error bars shown here are based on combining data from all three  
 175 sites each week. Error bars are 95% Clopper-Pearson confidence intervals.

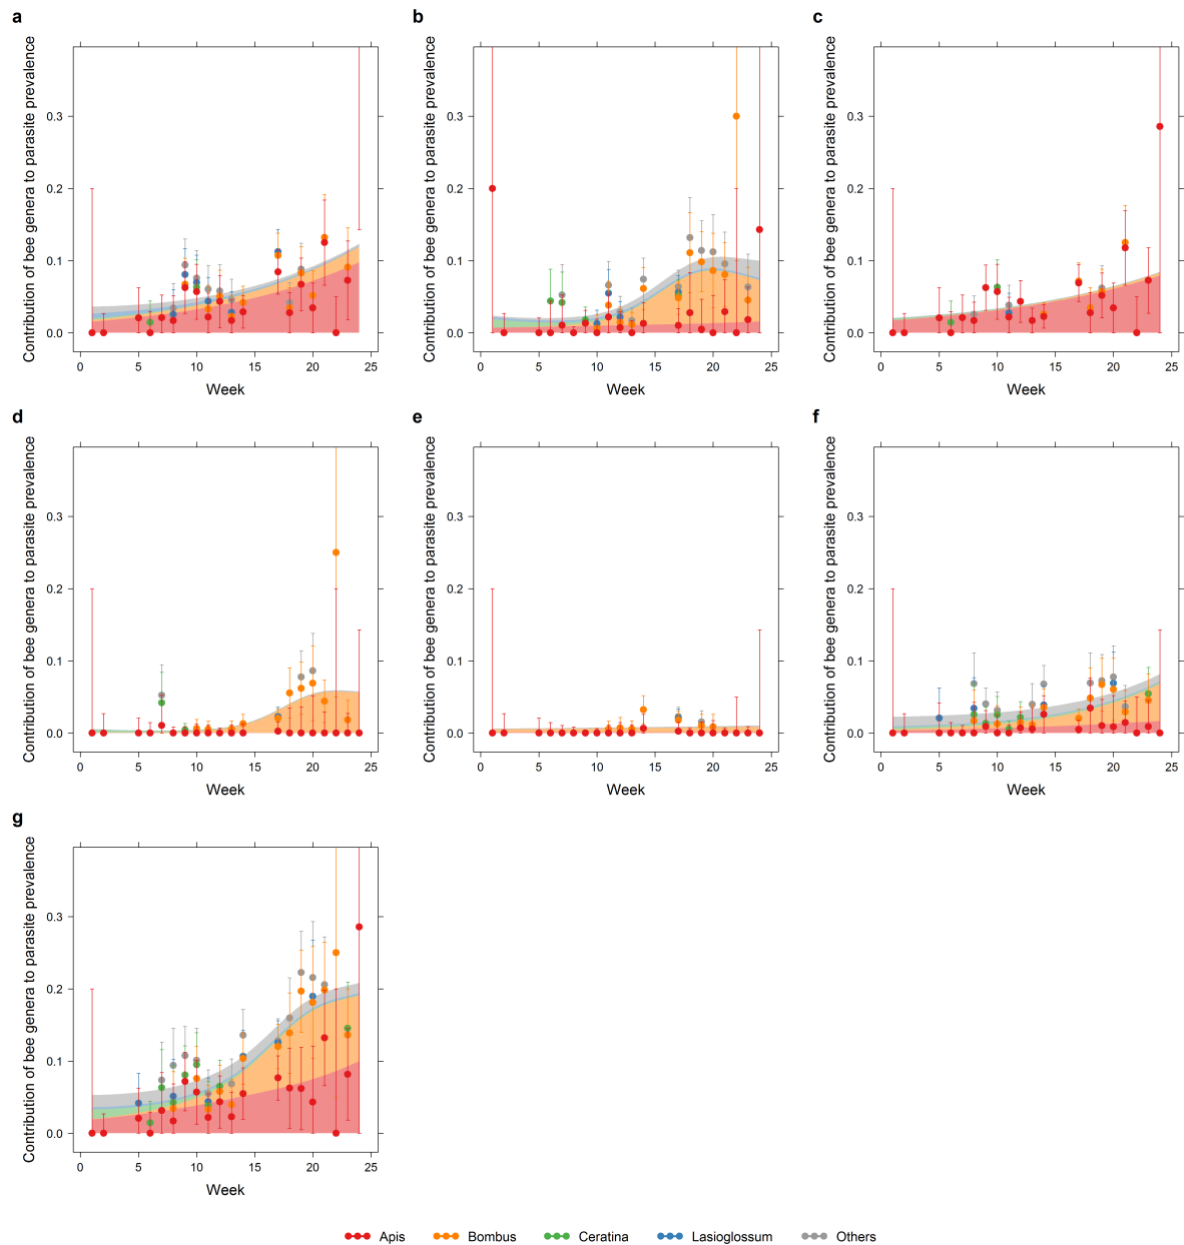

176  
177  
178  
179  
180  
181  
182  
183  
184

**Supplementary Fig. 3 | Contributions from each bee genus to overall prevalence of parasites in the community across the season.** Parasite species/groups shown here are (a) microsporidians, (b) trypanosomatids, (c) *N. ceranae*, (d) *C. bombi*, (e) *C. expoeki*, (f) neogregarines and (g) the four parasite species and neogregarines combined. Contributions were defined as (relative abundance of genus) × (parasite prevalence in genus), and plotted as stacked smoothing splines fitted using GAM with site as a random factor. Error bars are 95% Clopper-Pearson confidence intervals.

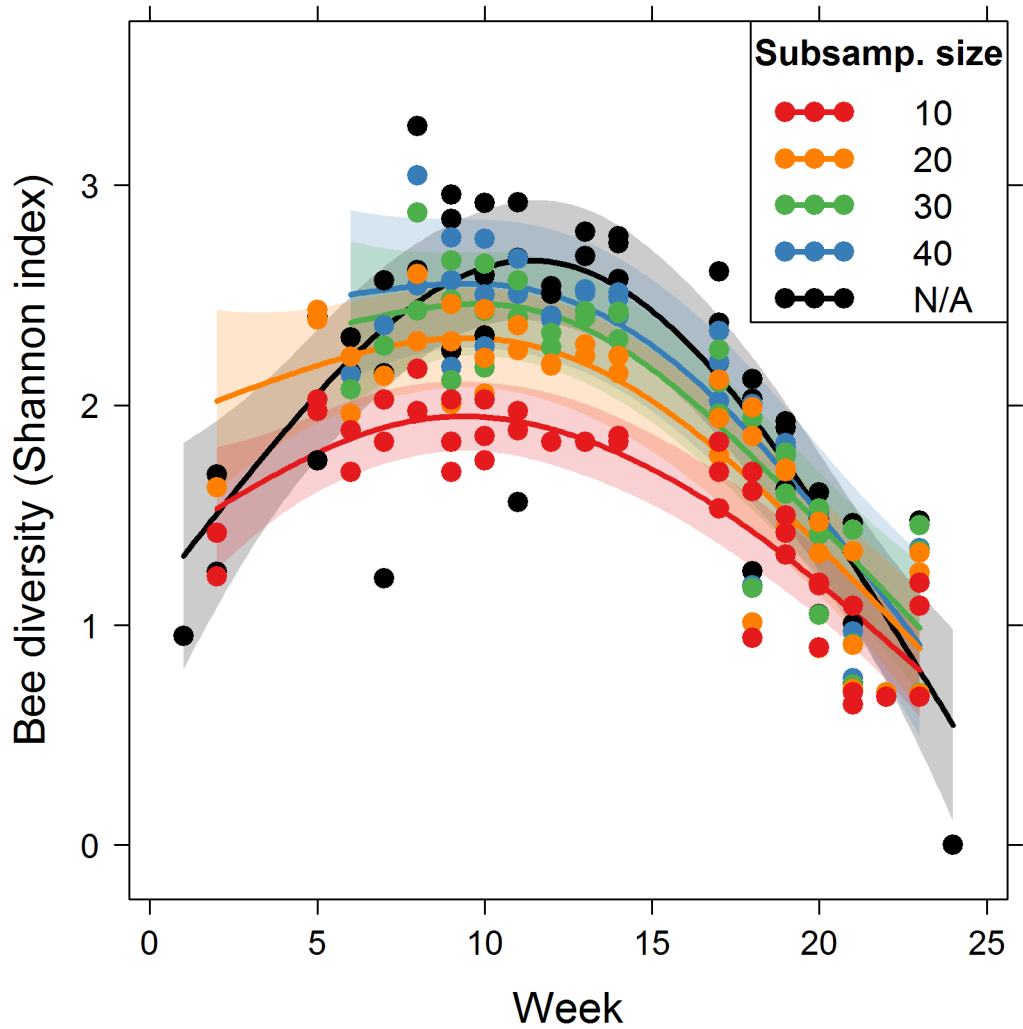

185  
 186 **Supplementary Fig. 4 | Bee diversity at different site and weeks, with and without**  
 187 **rarefaction.** Smaller subsample sizes allowed more site/week samples to be included,  
 188 especially those from earlier weeks, but at the expense of reducing the strength of any temporal  
 189 trends. Curves shown here are smoothing splines fitted using GAM with site as a random factor.  
 190

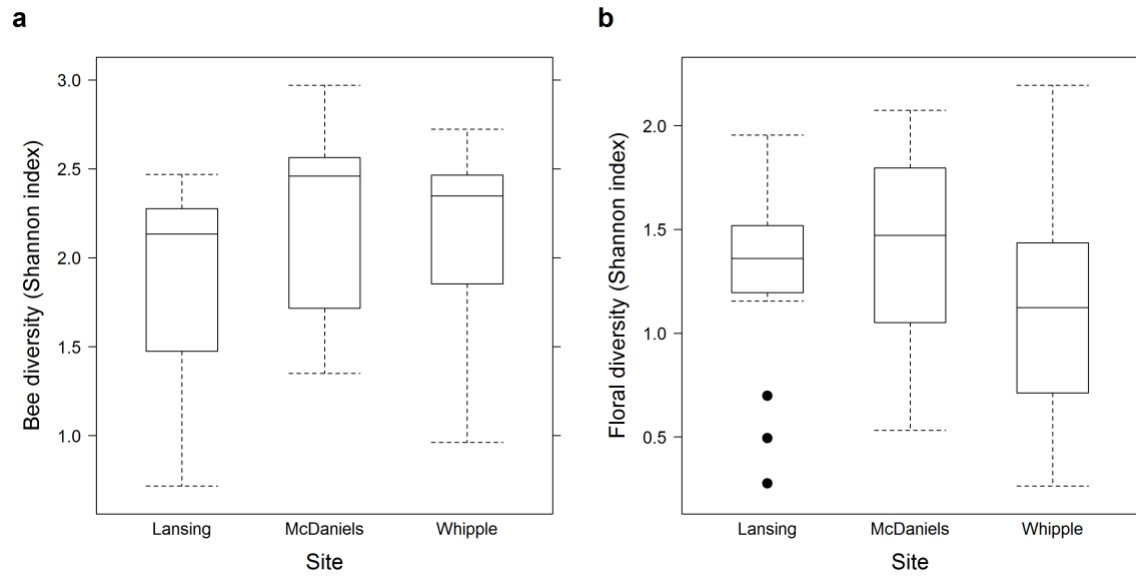

191  
192  
193  
194  
195

**Supplementary Fig. 5 | Variation in bee and floral diversities across sites.** Shannon indices for the (a) bee and (b) flower communities were calculated using bee samples and site floral surveys respectively, with different weeks as replicates.



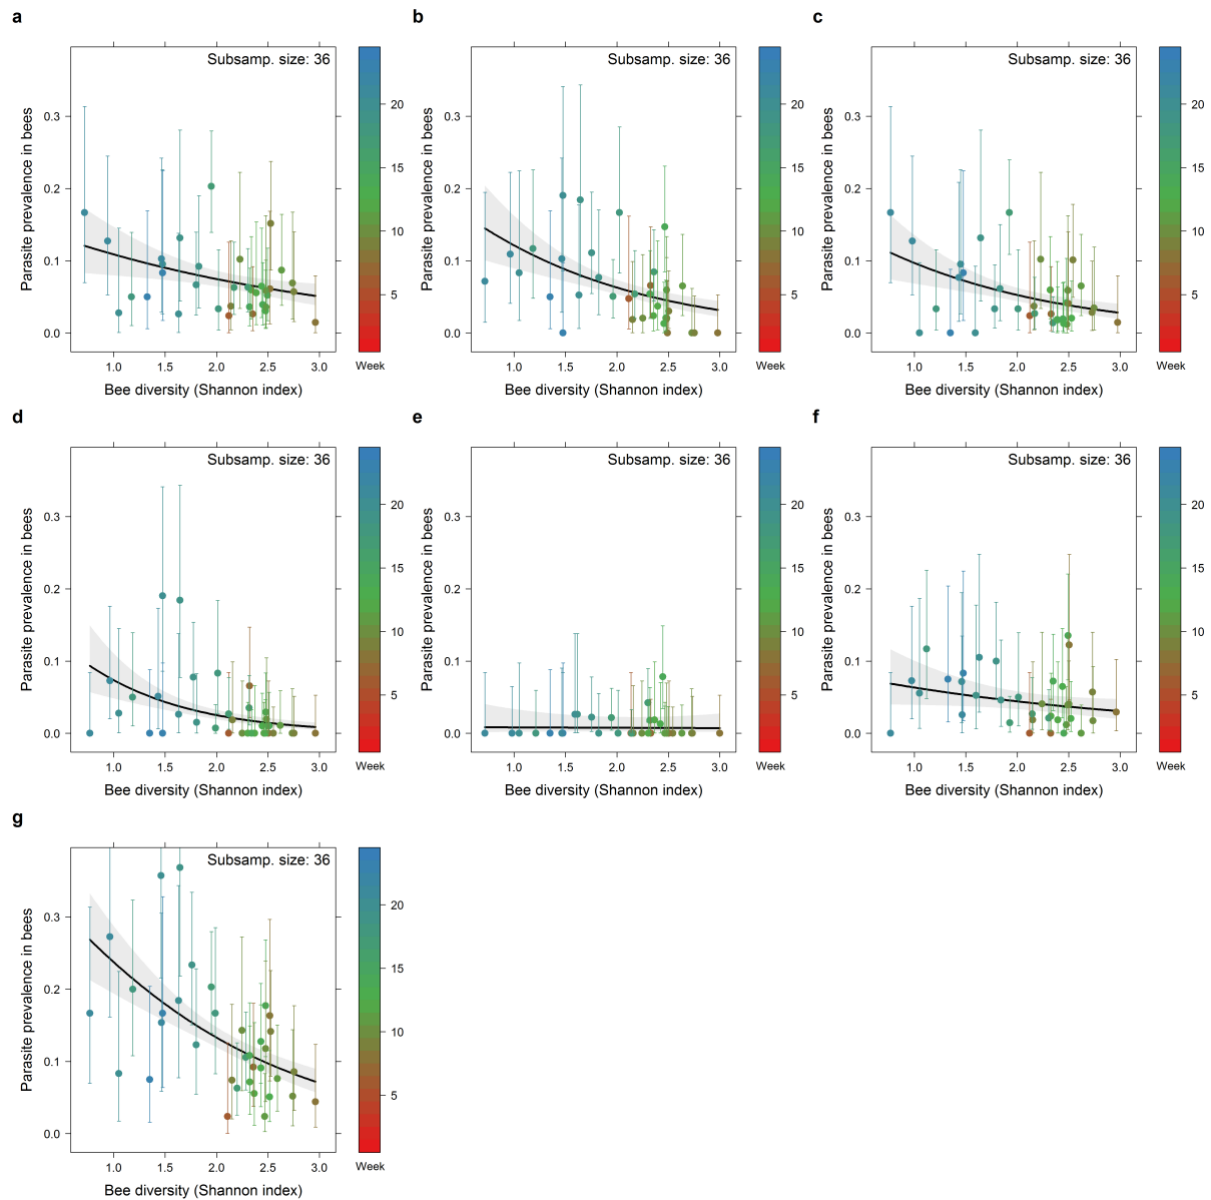

196  
 197 **Supplementary Fig. 6 | Association between the prevalence of different parasite**  
 198 **groups/species in bees and bee diversity.** Parasite species/groups shown here are (a)  
 199 microsporidians, (b) trypanosomatids, (c) *N. ceranae*, (d) *C. bombi*, (e) *C. expoeki*, (f)  
 200 neogregarines and (g) the four parasite species and neogregarines combined. Colour indicates  
 201 week number. Curves were fitted using binomial GLMMs with site as a random factor. Error  
 202 bars are 95% Clopper-Pearson confidence intervals.  
 203

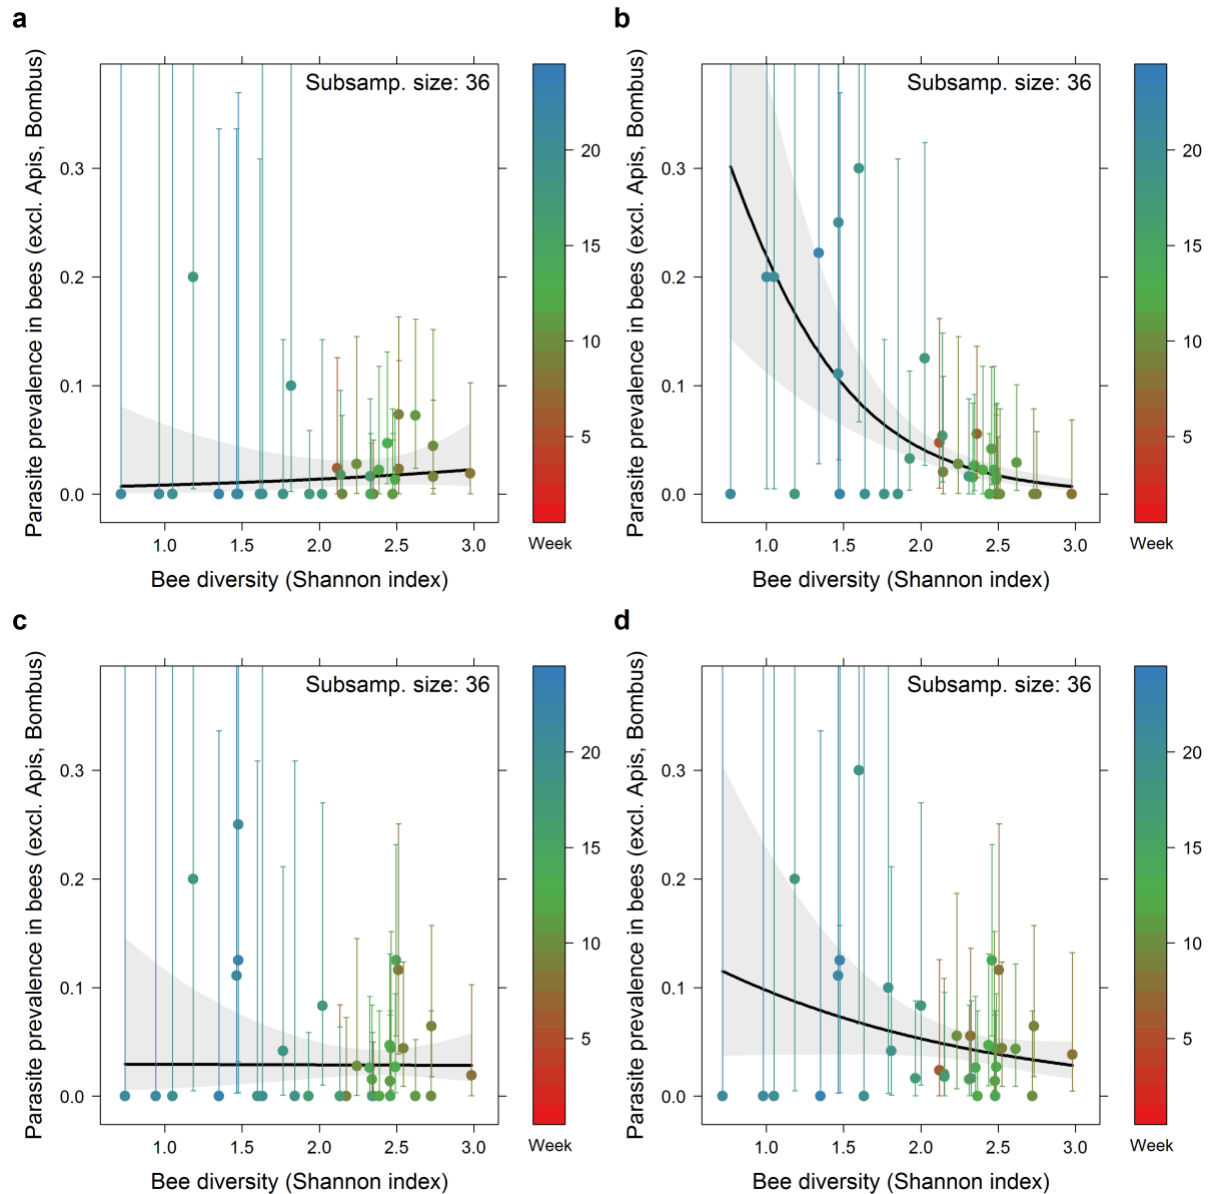

204  
 205  
 206  
 207  
 208  
 209  
 210  
 211  
 212

**Supplementary Fig. 7 | Association between the prevalence of different parasite groups/species in bees (excluding *Apis* and *Bombus*) and pollinator diversity.** Parasite species/groups shown here are (a) microsporidians, (b) trypanosomatids, (c) neogregarines and (d) the four parasite species and neogregarines combined. Colour indicates week number. Curves were fitted using binomial GLMMs with site as a random factor. Error bars are 95% Clopper-Pearson confidence intervals.

**a**

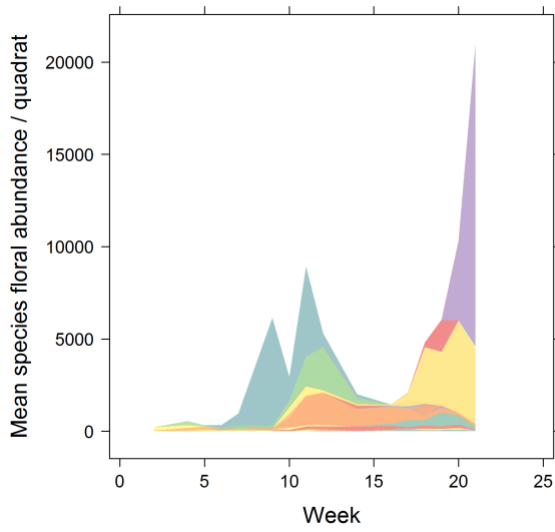

**b**

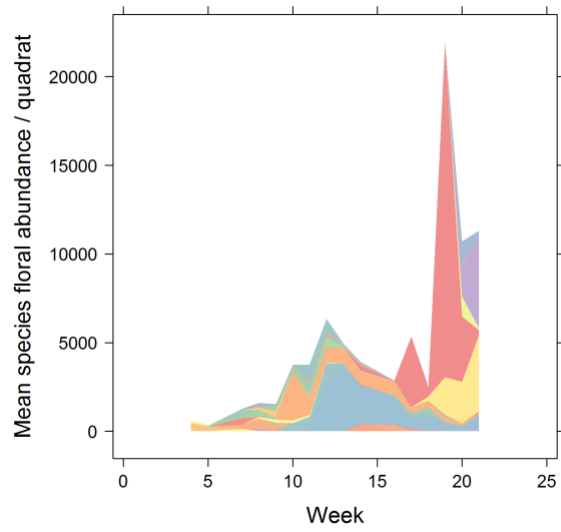

**c**

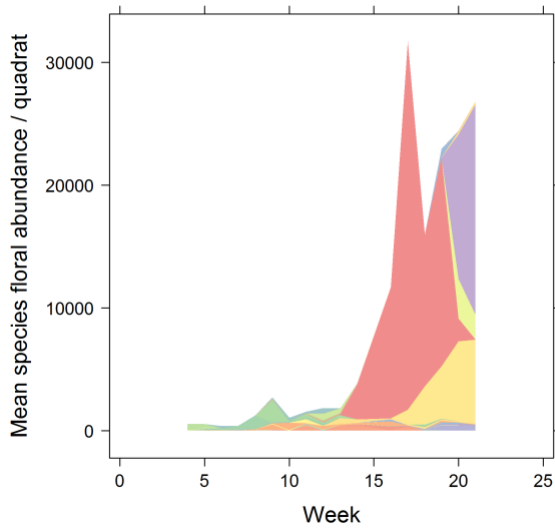

213  
214  
215  
216  
217

**Supplementary Fig. 8 | Species floral abundances across the season.** Mean floral abundances per quadrat were evaluated for each plant species at (a) Lansing, (b) McDaniels and (c) Whipple, and shown as stacked plots.

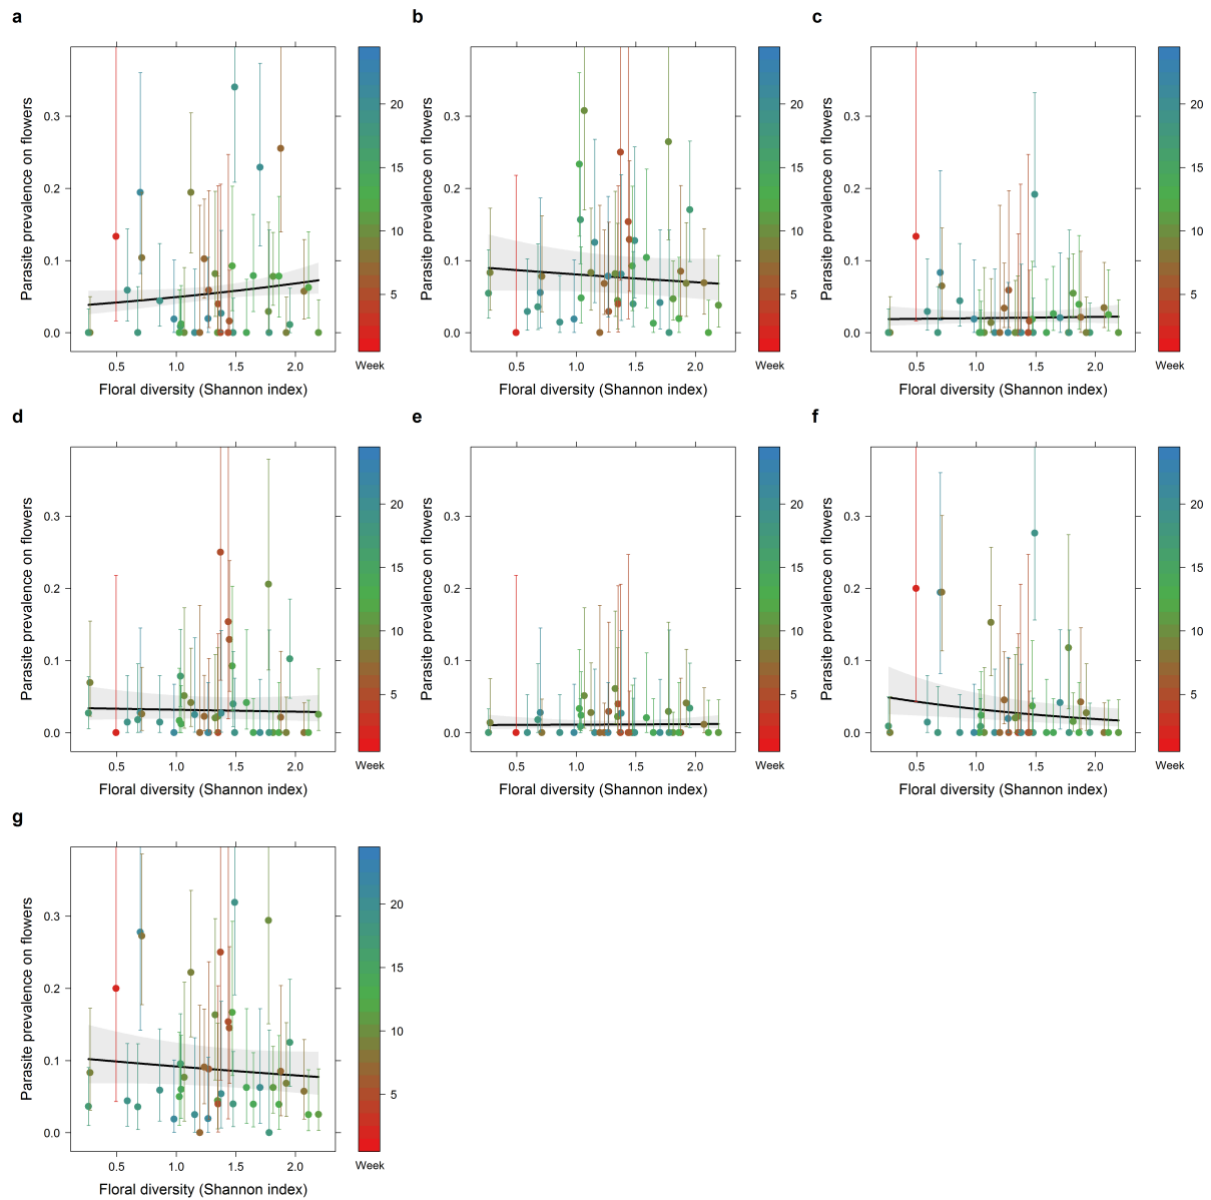

218  
 219 **Supplementary Fig. 9 | Association between the prevalence of different parasite**  
 220 **groups/species on flowers and floral diversity.** Parasite species/groups shown here are (a)  
 221 microsporidians, (b) trypanosomatids, (c) *N. bombi*, (d) *C. bombi*, (e) *C. expoeki*, (f)  
 222 neogregarines and (g) the four parasite species and neogregarines combined. Colour indicates  
 223 week number. Curves were fitted using binomial GLMMs with site as a random factor. Error  
 224 bars are 95% Clopper-Pearson confidence intervals.

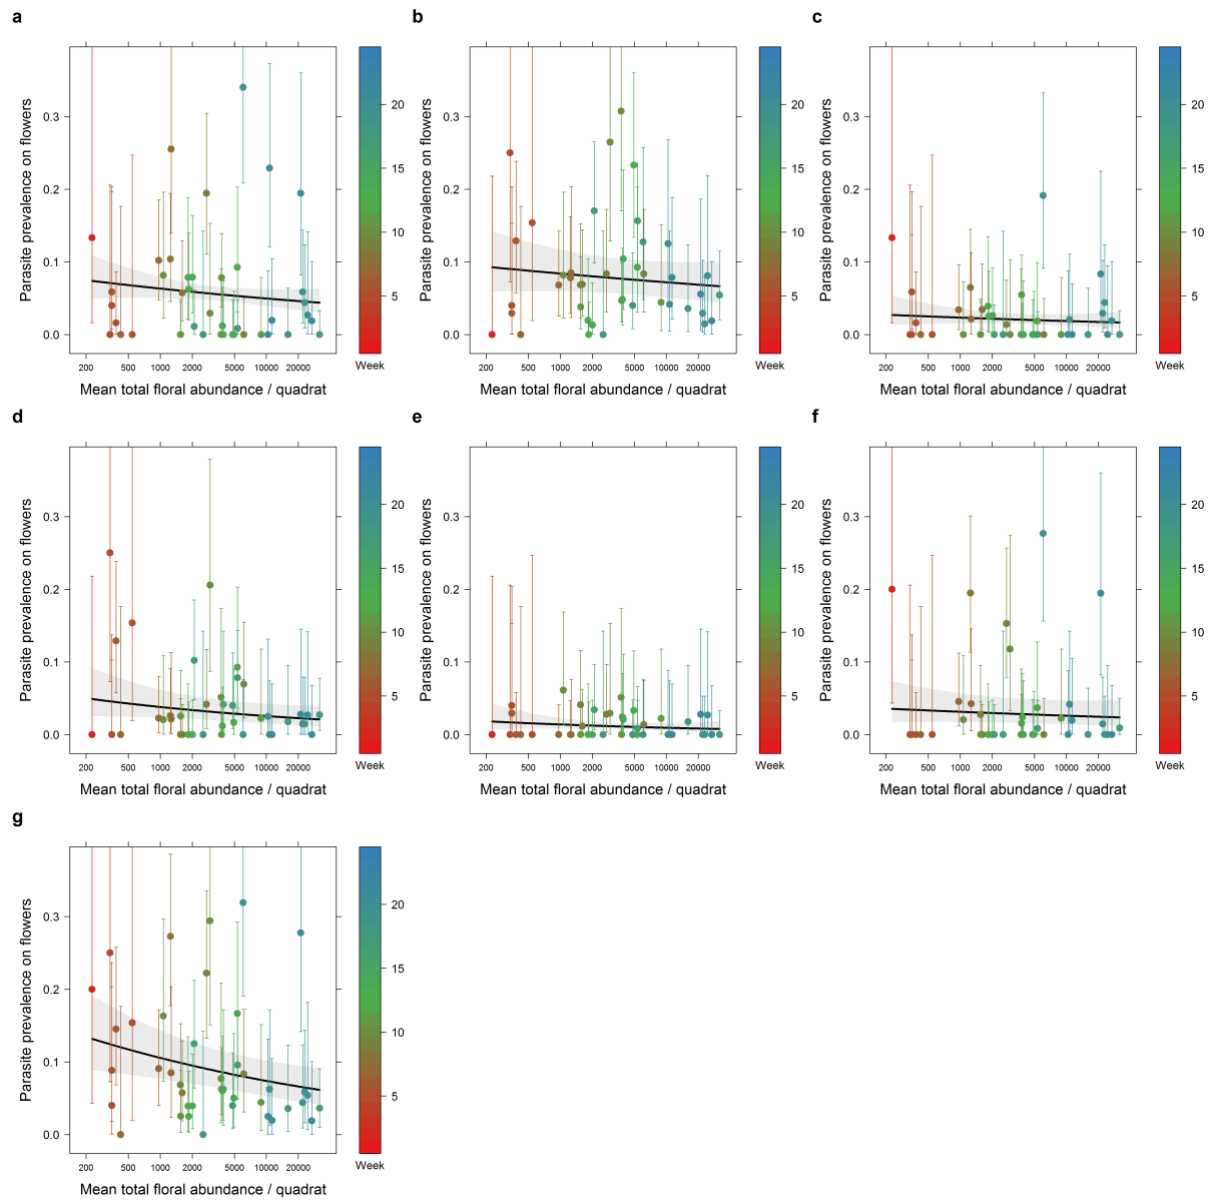

225  
 226 **Supplementary Fig. 10 | Association between the prevalence of different parasite**  
 227 **groups/species on flowers and total floral abundance.** Parasite species/groups shown here  
 228 are (a) microsporidians, (b) trypanosomatids, (c) *N. bombi*, (d) *C. bombi*, (e) *C. expoeki*, (f)  
 229 neogregarines and (g) the four parasite species and neogregarines combined. Colour indicates  
 230 week number. Curves were fitted using binomial GLMMs with site as a random factor. Error  
 231 bars are 95% Clopper-Pearson confidence intervals.  
 232

233 **Supplementary References**

234  
235  
236  
237  
238  
239  
240  
241  
242  
243  
244  
245  
246  
247  
248  
249  
250

1. Mullins, J. L., Strange, J. P. & Tripodi, A. D. Why Are Queens Broodless? Failed Nest Initiation Not Linked to Parasites, Mating Status, or Ovary Development in Two Bumble Bee Species of *Pyrobombus* (Hymenoptera: Apidae: *Bombus*). *J. Econ. Entomol.* (2019). doi:10.1093/jee/toz330
2. Meeus, I., de Graaf, D. C., Jans, K. & Smagghe, G. Multiplex PCR detection of slowly-evolving trypanosomatids and neogregarines in bumblebees using broad-range primers. *J. Appl. Microbiol.* **109**, 107–115 (2010).
3. Tripodi, A. D., Szalanski, A. L. & Strange, J. P. Novel multiplex PCR reveals multiple trypanosomatid species infecting North American bumble bees (Hymenoptera: Apidae: *Bombus*). *J. Invertebr. Pathol.* **153**, 147–155 (2018).
4. Gisder, S. & Genersch, E. Molecular differentiation of *Nosema apis* and *Nosema ceranae* based on species-specific sequence differences in a protein coding gene. *J. Invertebr. Pathol.* **113**, 1–6 (2013).
5. Untergasser, A. *et al.* Primer3-new capabilities and interfaces. *Nucleic Acids Res.* **40**, 1–12 (2012).
